# Supplementary material for: Genome-Wide Identification and Expression Analysis of LOX Gene Family in Rice (Oryza sativa L.) Under Abiotic Stress Conditions
Source: Research Square preprint supplement (doi:10.21203/rs.3.rs-8728944/v1), 2026-02-24

**OsLOX1**


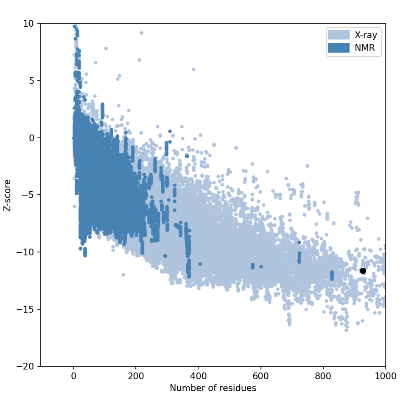


**OsLOX2**


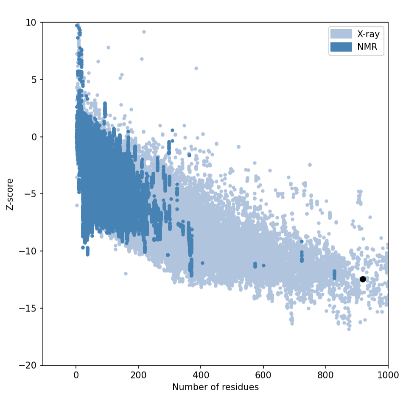


**OsLOX3**


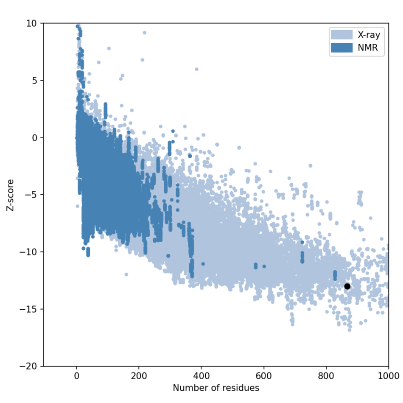


**OsLOX4**


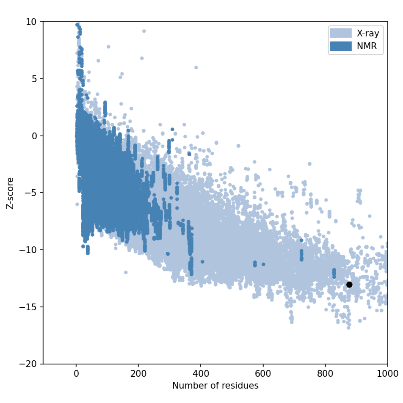


**OsLOX5**

**Figure S4.** Z-score representation of the 3D structures of OsLOXs. The Z-scores of proteins derived from X-ray crystallography are displayed in light blue, whereas those obtained from nuclear magnetic resonance (NMR) spectroscopy are represented in dark blue. Each protein's Z-score is displayed as a black dot.


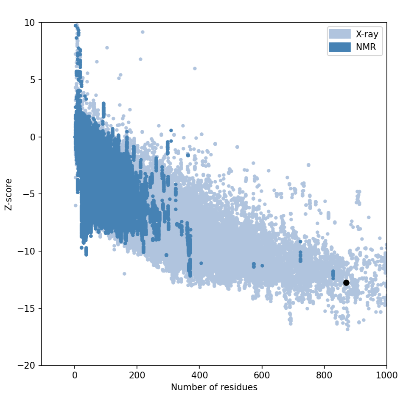


**OsLOX6**


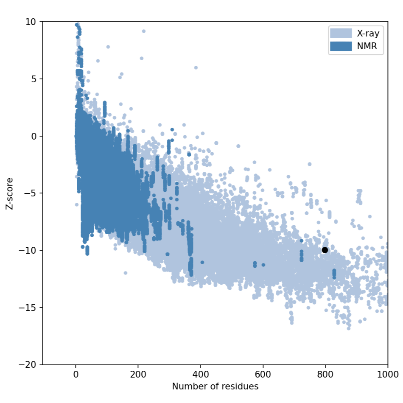


**OsLOX7**


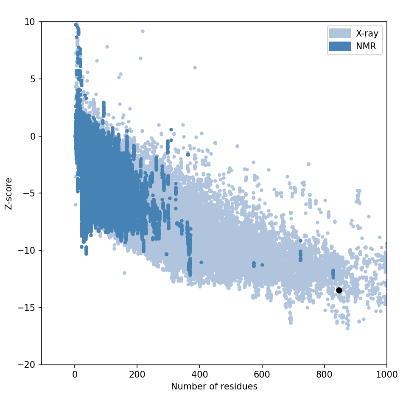


**OsLOX8**


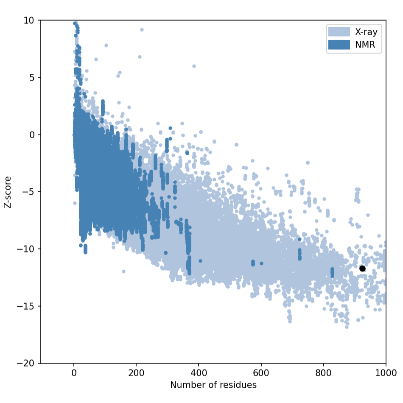


**OsLOX9**


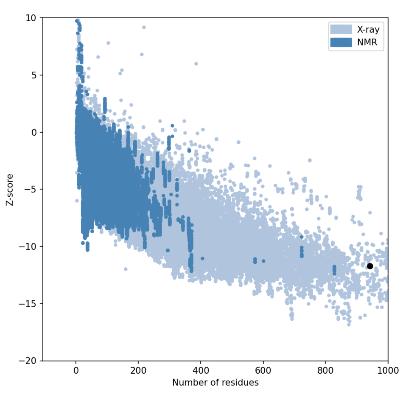


**OsLOX10**


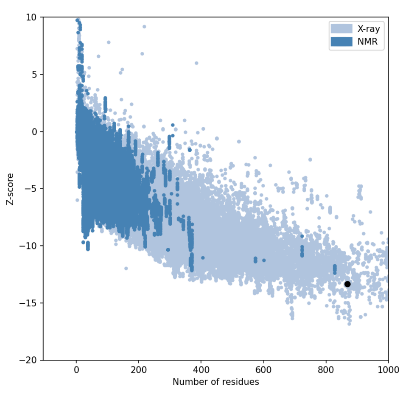


**OsLOX11**


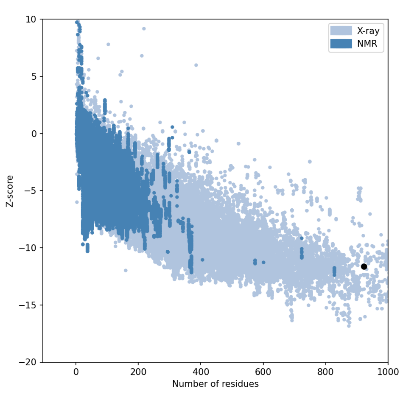


**OsLOX12**


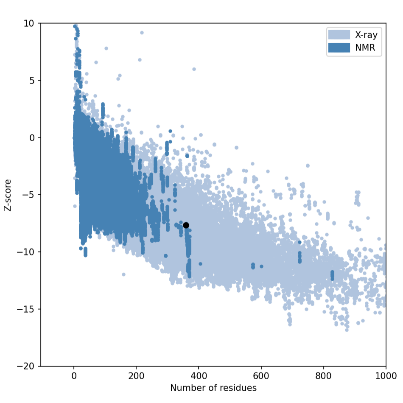

Supplement: Supplementary file 4 [file 56aca7885bd70438f0505853.docx]
