# Supplementary material for: Genome-Wide Identification and Expression Analysis of LOX Gene Family in Rice (Oryza sativa L.) Under Abiotic Stress Conditions
Source: Research Square preprint supplement (doi:10.21203/rs.3.rs-8728944/v1), 2026-02-24

**OsLOX1**


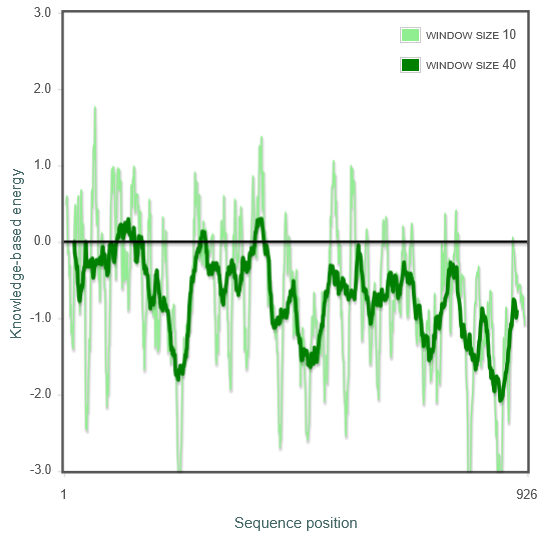


**OsLOX2**


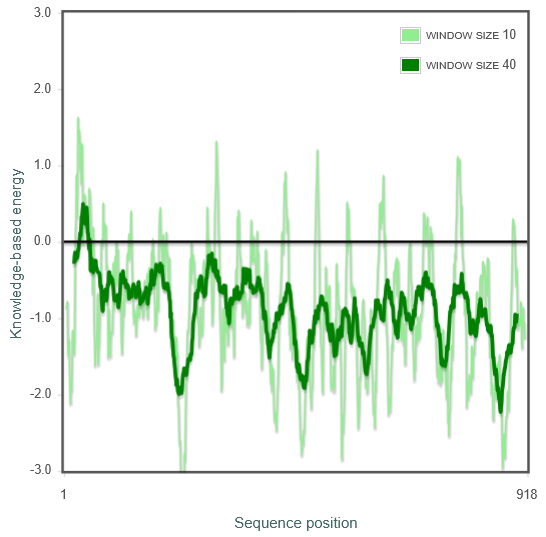


**OsLOX3**


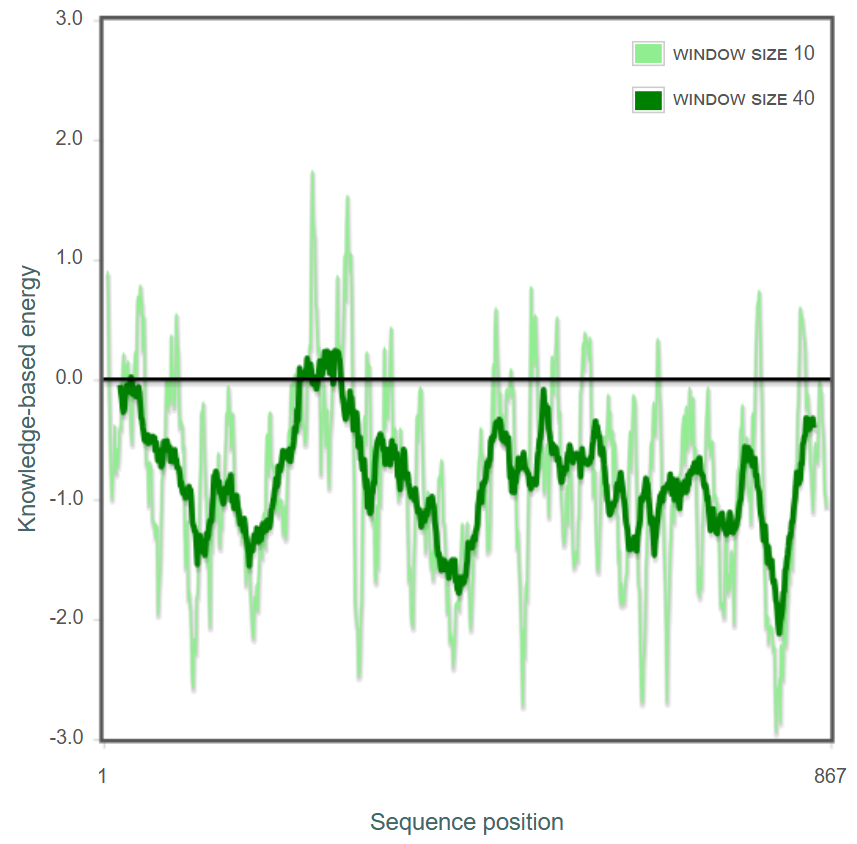


**OsLOX4**


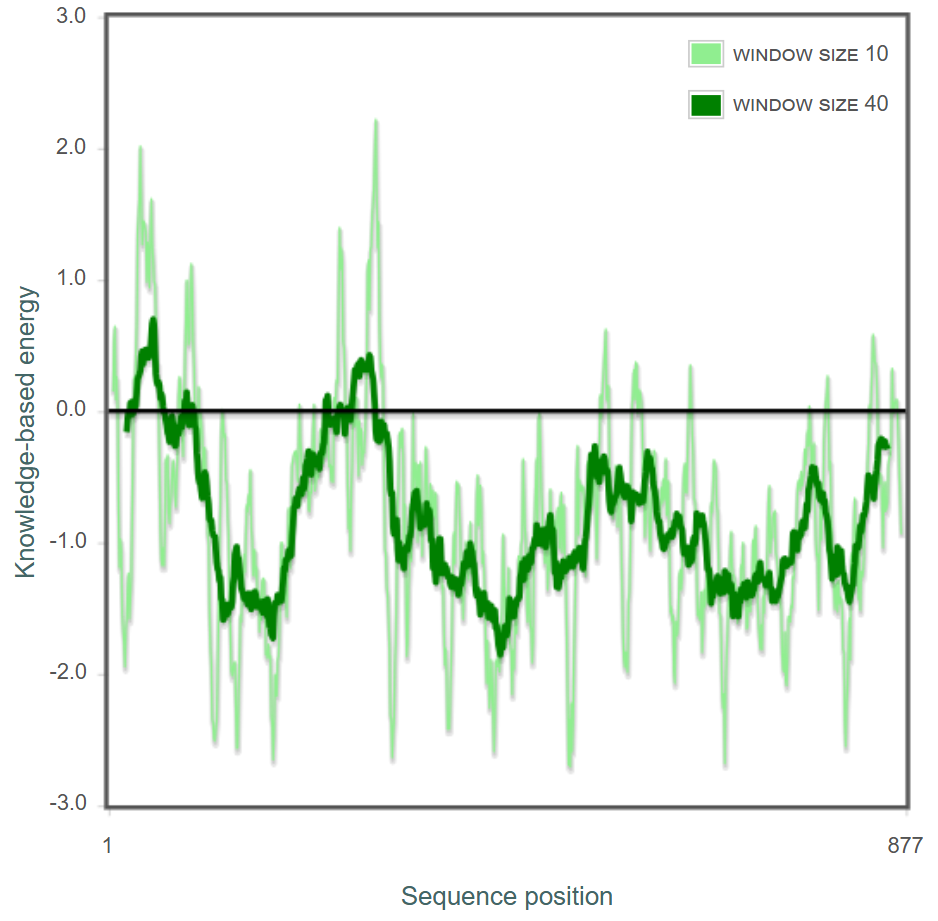


**OsLOX5**

**Figure S5.** Energy plot of the 3D structures of OsLOXs. The plot was created employing ProSA-Web. The dark green line indicates the average energy across each fragment of 40 residues, while the light green line represents the average energy across each fragment of 10 residues.


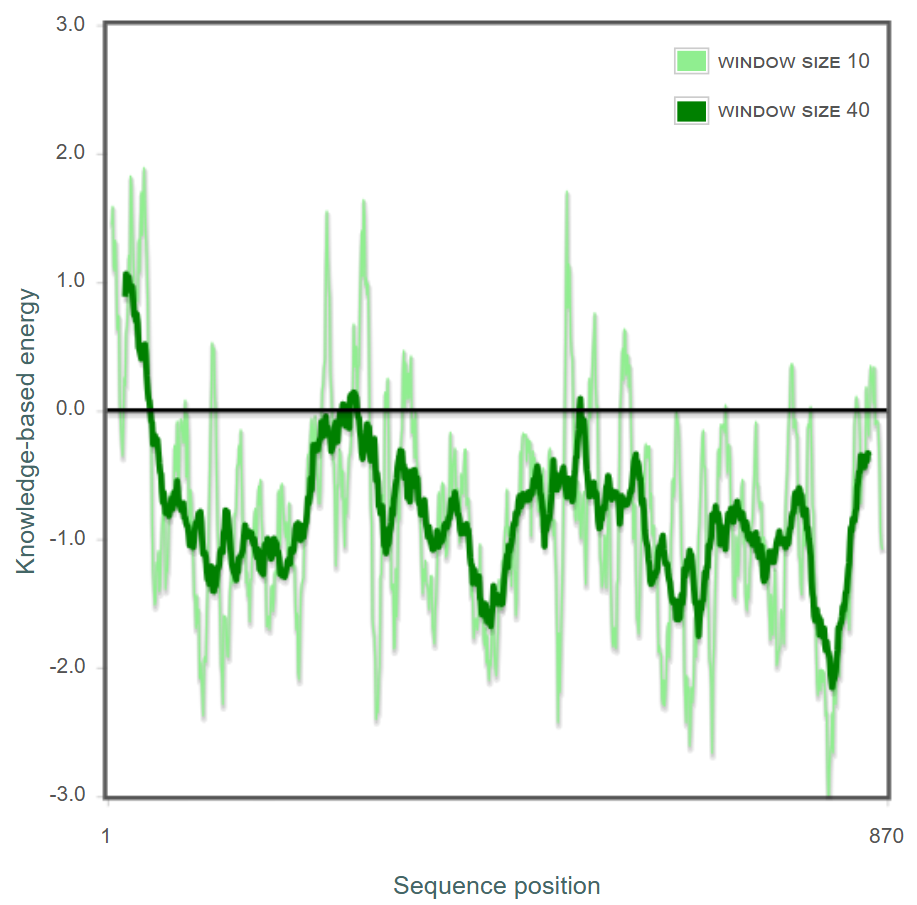


**OsLOX6**


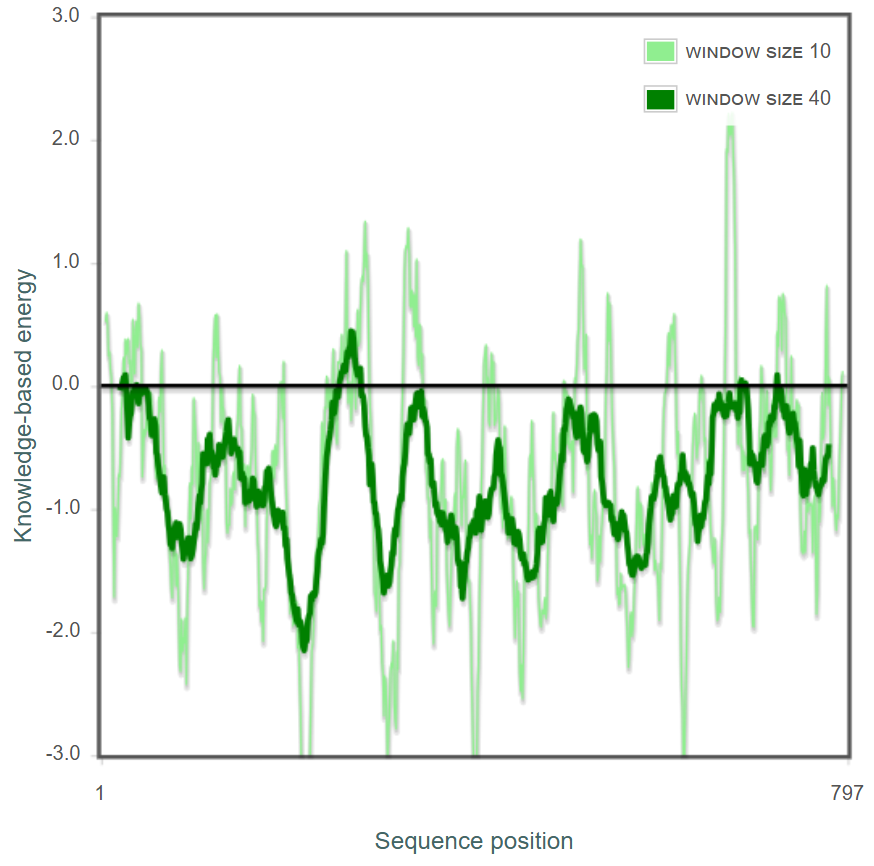


**OsLOX7**


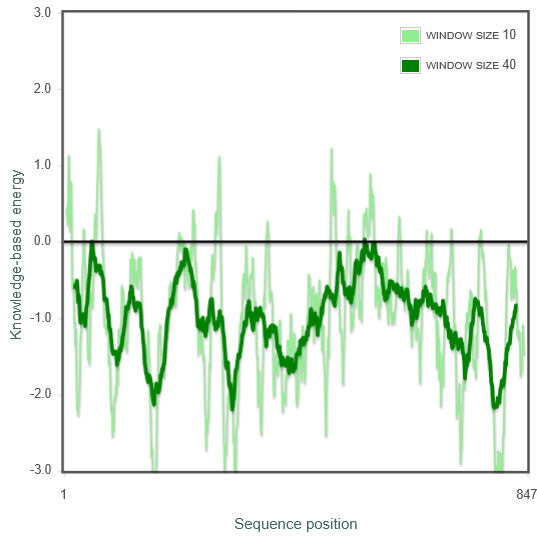


**OsLOX8**


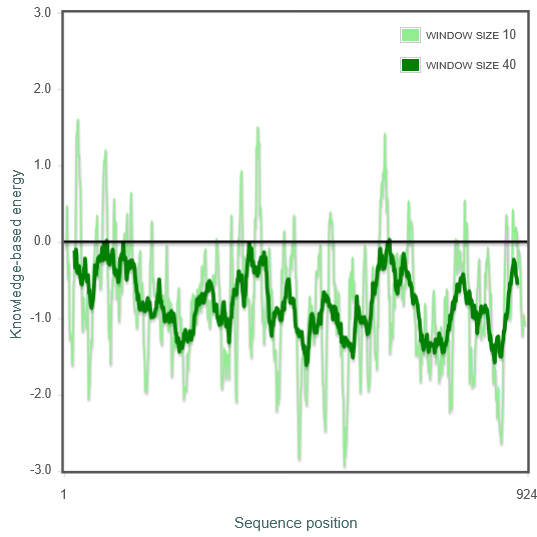


**OsLOX9**


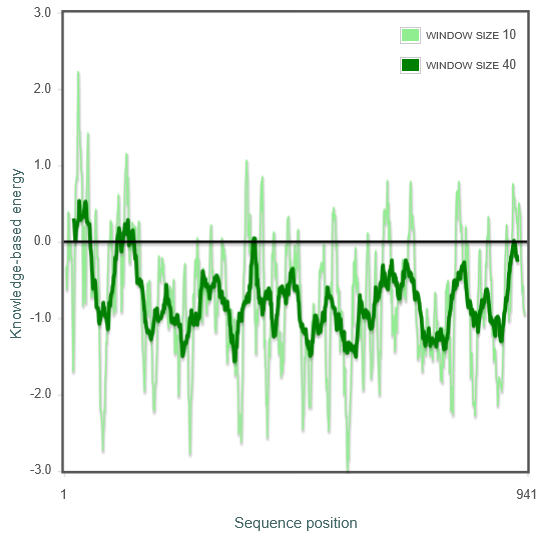


**OsLOX10**


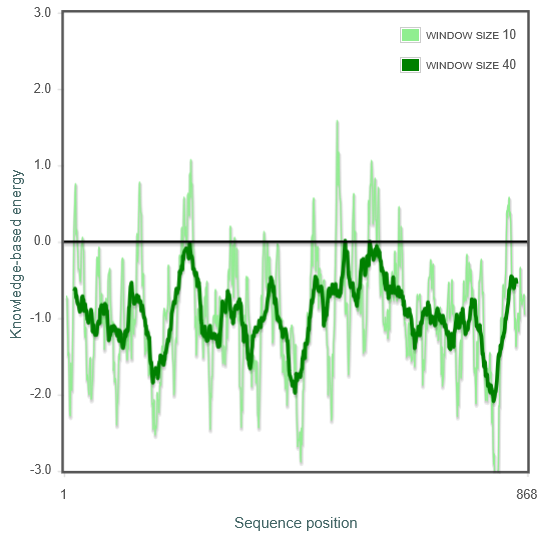


**OsLOX11**


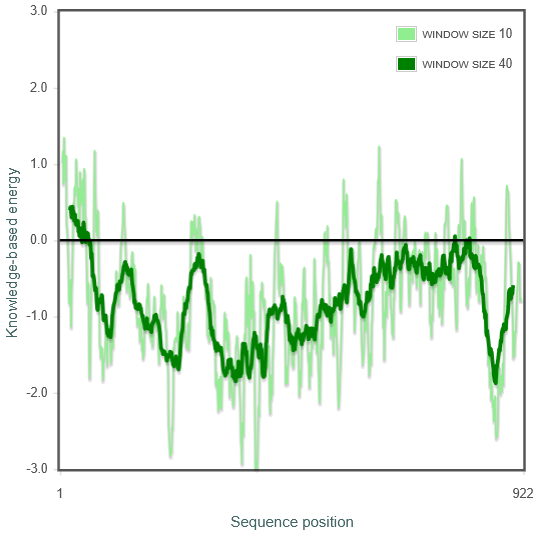


**OsLOX12**


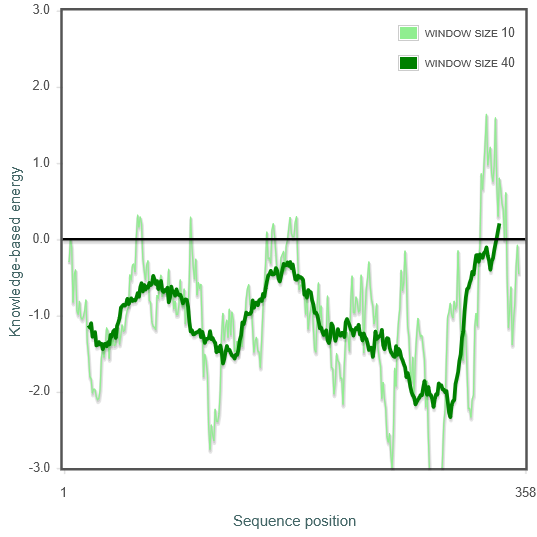

Supplement: Supplementary file 2 [file 294ec2a1b0b4f5cd85cc6785.docx]
