# Supplementary material for: Genome-Wide Identification and Expression Analysis of LOX Gene Family in Rice (Oryza sativa L.) Under Abiotic Stress Conditions
Source: Research Square preprint supplement (doi:10.21203/rs.3.rs-8728944/v1), 2026-02-24
Supplement: Supplementary file 1 [file 081167563815db7089a8dc53.docx]

**Table S6.** List of miRNAs that target various LOX genes along with mode of inhibition.

| **Gene Name** | **Number of targetting miRNA** | **miRNA** | **miRNA sequence** | **Length(nt)** | **Inhibition** |
| --- | --- | --- | --- | --- | --- |
| *OsLOX1* | 19 | Osa-miR5809a | 21 | ACUCGUCGCCGGCGACCACAG | Translation |
| Osa-miR5809b | 20 | UCGUCGCCGGCGACCACAGC | Cleavage |
| Osa-miRN2268a | 21 | CCGCCGACGCCGACAGGAGCU | Cleavage |
| Osa-miRN2268b | 21 | CCGCCGACGCCGACAGGAGCU | Cleavage |
| Osa-miR1846a | 24 | AGUGAGGAGGCCGGGGCCGCUGGA | Cleavage |
| Osa-miR1846c | 21 | AGUGAGGAGGCCGGGGCCGCU | Cleavage |
| Osa-miR1846f | 20 | AGUGAGGAGGCCGGGGCCGC | Cleavage |
| Osa-miR1846h | 20 | AGUGAGGAGGCCGGGGCCGC | Cleavage |
| Osa-miR5809b | 20 | UCGUCGCCGGCGACCACAGC | Cleavage |
| Osa-miR5809b | 20 | UCGUCGCCGGCGACCACAGC | Translation |
| Osa-miRN2294 | 21 | UCGGAGGUGACUCACUUGUGA | Cleavage |
| Osa-miR169d | 21 | UAGCCAAGGAUGAAUUGCCGG | Cleavage |
| Osa-miR394 | 20 | UUGGCAUUCUGUCCACCUCC | Cleavage |
| Osa-miR5809a | 21 | ACUCGUCGCCGGCGACCACAG | Cleavage |
| Osa-miR820a | 22 | UCGGCCUCGUGGAUGGACCAGG | Cleavage |
| Osa-miR820b | 24 | UCGGCCUCGUGGAUGGACCAGGAG | Cleavage |
| Osa-miR820c | 24 | UCGGCCUCGUGGAUGGACCAGGAG | Cleavage |
| Osa-miRN2332 | 21 | AUGCCAGUUUGAUCGCAGGAU | Cleavage |
| Osa-miRN2352 | 21 | GUGUAUGAUCUAGAAGACGUG | Cleavage |
| *OsLOX2* | 4 | Osa-miR399d | 20 | ACAGUAGUAGGCAGCUCUCC | Cleavage |
| Osa-miRN2355 | 21 | AUGGUAAUAAGUAGUGCAGGC | Cleavage |
| Osa-miRN2315 | 21 | UGGAUGUAAUGUAGUGGUGUC | Translation |
| Osa-miRN2361 | 21 | GGUCAGACUGGCGACGGUGAC | Cleavage |
| *OsLOX3* | 14 | Osa-miR1861d | 21 | GGUCUUGAGGCAGGAACUGAG | Translation |
| Osa-miR1861h | 22 | CGGUCUUGAGGCAGGAACUGAG | Cleavage |
| Osa-miR1861j | 22 | CGGUCUUGAGGCAGGAACUGAG | Cleavage |
| Osa-miR1431 | 21 | UUUGCGAGUUGGCCCGCUUGC | Cleavage |
| Osa-miR172c | 21 | UGAAUCUUGAUGAUGCUGCAC | Cleavage |
| Osa-miR5516a | 21 | CUCAUUGCUUCGGUAGGCUGG | Translation |
| Osa-miR5516b | 21 | CUCAUUGCUUCGGUAGGCUGG | Translation |
| Osa-miR5788b | 21 | ACUAGGAUAUGUCACAUCCAG | Translation |
| Osa-miR5788c | 21 | ACUAGGAUAUGUCACAUCCAG | Translation |
| Osa-miR5788d | 21 | ACUAGGAUAUGUCACAUCCAG | Translation |
| Osa-miR5788e | 21 | ACUAGGAUAUGUCACAUCCAG | Translation |
| Osa-miR5788f | 21 | ACUAGGAUAUGUCACAUCCAG | Translation |
| Osa-miRN2203a | 21 | ACUAGGAUAUGUCACAUCCAG | Translation |
| Osa-miRN2203b | 21 | ACUAGGAUAUGUCACAUCCAG | Translation |
| *OsLOX4* | 17 | Osa-miRN2323a | 21 | UUUUUGUUUGGUUGGAUGGAU | Cleavage |
| Osa-miRN2323b | 21 | UUUUUGUUUGGUUGGAUGGAU | Cleavage |
| Osa-miRN2323c | 21 | UUUUUGUUUGGUUGGAUGGAU | Cleavage |
| Osa-miRN2321 | 21 | CUGCGUUGAACUGUCGGUCAU | Translation |
| Osa-miR159c | 20 | AUUGGAUUGAAGGGAGCUCC | Cleavage |
| Osa-miR159d | 20 | AUUGGAUUGAAGGGAGCUCC | Cleavage |
| Osa-miR159e | 20 | AUUGGAUUGAAGGGAGCUCC | Cleavage |
| Osa-miR2275e | 22 | UUCAGUUUCCUCCAACAUCUUA | Cleavage |
| Osa-miR397a | 21 | UUGAGUGCAGCGUUGAUGAAC | Cleavage |
| Osa-miR397b | 22 | UUGAGUGCAGCGUUGAUGAACC | Cleavage |
| Osa-miR531a | 22 | CUCGCCGGGGCUGCGUGCCGCC | Cleavage |
| Osa-miR531b | 23 | CUCGCCGGGGCUGCGUGCCGCCA | Cleavage |
| Osa-miR531c | 22 | CUCGCCGGGGCUGCGUGCCGCC | Cleavage |
| Osa-miR531d | 22 | CUCGCCGGGGCUGCGUGCCGCC | Cleavage |
| Osa-miR531e | 22 | CUCGCCGGGGCUGCGUGCCGCC | Cleavage |
| Osa-miR5809a | 21 | ACUCGUCGCCGGCGACCACAG | Cleavage |
| Osa-miRN2294 | 21 | UCGGAGGUGACUCACUUGUGA | Cleavage |
| *OsLOX5* | 10 | Osa-miR1861d | 21 | GGUCUUGAGGCAGGAACUGAG | Translation |
| Osa-miR1861h | 22 | CGGUCUUGAGGCAGGAACUGAG | Cleavage |
| Osa-miR1861j | 22 | CGGUCUUGAGGCAGGAACUGAG | Cleavage |
| Osa-miR5809b | 20 | UCGUCGCCGGCGACCACAGC | Cleavage |
| Osa-miRN2321 | 21 | CUGCGUUGAACUGUCGGUCAU | Translation |
| Osa-miR531a | 22 | CUCGCCGGGGCUGCGUGCCGCC | Translation |
| Osa-miR531b | 23 | CUCGCCGGGGCUGCGUGCCGCCA | Translation |
| Osa-miR531c | 22 | CUCGCCGGGGCUGCGUGCCGCC | Translation |
| Osa-miR531d | 22 | CUCGCCGGGGCUGCGUGCCGCC | Translation |
| Osa-miR531e | 22 | CUCGCCGGGGCUGCGUGCCGCC | Translation |
| *OsLOX6* | 25 | Osa-miR5833 | 21 | UCCUCCUCGGGCUCAUCGGGC | Cleavage |
| Osa-miR812u | 21 | GACAAUCAAACGUUGGACACG | Cleavage |
| Osa-miRN2294 | 21 | UCGGAGGUGACUCACUUGUGA | Cleavage |
| Osa-miR160f | 21 | UGCCUGGCUCCCUGAAUGCCA | Translation |
| Osa-miR812aj | 24 | ACAGUCAAACGUUGGACACGGAUA | Cleavage |
| Osa-miR812al | 24 | ACAGUCAAACGUUGGACACGGAUA | Cleavage |
| Osa-miRN2303a | 21 | UAGUGGAGUUGUGGAGCUGCC | Cleavage |
| Osa-miRN2303b | 21 | UAGUGGAGUUGUGGAGCUGCC | Cleavage |
| Osa-miR2275g | 22 | CUUGUUUUCCUCCAAUAUCUCA | Cleavage |
| Osa-miR2275g | 22 | CUUGUUUUCCUCCAAUAUCUCA | Cleavage |
| Osa-miR2275h | 22 | CUUGUUUUCCUCCAAUAUCUCA | Cleavage |
| Osa-miR2275h | 22 | CUUGUUUUCCUCCAAUAUCUCA | Cleavage |
| Osa-miR408 | 21 | CUGCACUGCCUCUUCCCUGGC | Cleavage |
| Osa-miR5809b | 20 | UCGUCGCCGGCGACCACAGC | Cleavage |
| Osa-miR812aq | 22 | GACAGUUAAACGUUGGACACGG | Cleavage |
| Osa-miR812ar | 20 | ACAGUUAAACGUUGGACACG | Cleavage |
| Osa-miR812c | 20 | ACAGUUAAACGUUGGACACG | Cleavage |
| Osa-miR812d | 20 | ACAGUUAAACGUUGGACACG | Cleavage |
| Osa-miR812e | 20 | ACAGUUAAACGUUGGACACG | Cleavage |
| Osa-miR812k | 20 | ACAGUUAAACGUUGGACACG | Cleavage |
| Osa-miR812l | 22 | GACGGUCAAAUGUUAGACACGG | Cleavage |
| Osa-miR812q | 22 | GACGGUCAAAUGUUAGACACGG | Cleavage |
| Osa-miR812r | 22 | GACGGUCAAAUGUUAGACACGG | Cleavage |
| Osa-miR812w | 22 | GACGGUCAAAUGUUAGACACGG | Cleavage |
| Osa-miRN2292 | 21 | CCGUGGAUGUCUGUCAGAGCA | Cleavage |
| *OsLOX7* | 20 | Osa-miR1846b | 21 | UGACCCCGUUCUCCUCGCCGG | Cleavage |
| Osa-miR1846g | 21 | UGACCCCGUUCUCCUCGCCGG | Cleavage |
| Osa-miRN2371 | 21 | UUGCAGUCGAUAGUGGAAGAC | Translation |
| Osa-miR166e | 21 | GGAAUGUUGUCUGGUUCAAGG | Cleavage |
| Osa-miR171a | 21 | UUGAGCCGCGCCAAUAUCUCU | Cleavage |
| Osa-miR1861d | 21 | GGUCUUGAGGCAGGAACUGAG | Cleavage |
| Osa-miR5809b | 20 | UCGUCGCCGGCGACCACAGC | Cleavage |
| Osa-miR5809b | 20 | UCGUCGCCGGCGACCACAGC | Cleavage |
| Osa-miR9664 | 21 | AUGCAGUCCUCGAUGUCGUAG | Cleavage |
| Osa-miRN2331 | 21 | UUGUGUUCGACUGUCCAUGCA | Translation |
| Osa-miR170 | 21 | UUGAGCCGCGUCAAUAUCUCU | Cleavage |
| Osa-miR1861b | 22 | CGAUCUUGAGGCAGGAACUGAG | Cleavage |
| Osa-miR1861f | 22 | CGAUCUUGAGGCAGGAACUGAG | Cleavage |
| Osa-miR1861i | 22 | CGAUCUUGAGGCAGGAACUGAG | Cleavage |
| Osa-miR1861l | 22 | CGAUCUUGAGGCAGGAACUGAG | Cleavage |
| Osa-miR2118c | 22 | UUCCCGAUGCCUCCUAUUCCUA | Cleavage |
| Osa-miR2118l | 22 | UUCCCGAUGCCUCCUAUUCCUA | Cleavage |
| Osa-miRN2195a | 21 | AUGAACGGAACCCUAACGGCG | Cleavage |
| Osa-miRN2195b | 21 | AUGAACGGAACCCUAACGGCG | Cleavage |
| Osa-miRN2195c | 21 | AUGAACGGAACCCUAACGGCG | Cleavage |
| *OsLOX8* | 12 | Osa-miRN2347 | 21 | UCAGCAGAAGUUUCCUGAAUC | Cleavage |
| Osa-miR5809a | 21 | ACUCGUCGCCGGCGACCACAG | Cleavage |
| Osa-miR5809b | 20 | UCGUCGCCGGCGACCACAGC | Cleavage |
| Osa-miR408 | 21 | CUGCACUGCCUCUUCCCUGGC | Translation |
| Osa-miR5809a | 21 | ACUCGUCGCCGGCGACCACAG | Cleavage |
| Osa-miR5809b | 20 | UCGUCGCCGGCGACCACAGC | Cleavage |
| Osa-miR5819a | 21 | AGGACGAGGGGAACGGCGGCG | Cleavage |
| Osa-miR5819b | 21 | AGGACGAGGGGAACGGCGGCG | Cleavage |
| Osa-miR5819c | 21 | AGGACGAGGGGAACGGCGGCG | Cleavage |
| Osa-miRN2323a | 21 | UUUUUGUUUGGUUGGAUGGAU | Cleavage |
| Osa-miRN2323b | 21 | UUUUUGUUUGGUUGGAUGGAU | Cleavage |
| Osa-miRN2323c | 21 | UUUUUGUUUGGUUGGAUGGAU | Cleavage |
| *OsLOX9* | 15 | Osa-miR5809a | 21 | ACUCGUCGCCGGCGACCACAG | Cleavage |
| Osa-miR5819a | 21 | AGGACGAGGGGAACGGCGGCG | Cleavage |
| Osa-miR5819b | 21 | AGGACGAGGGGAACGGCGGCG | Cleavage |
| Osa-miR5819c | 21 | AGGACGAGGGGAACGGCGGCG | Cleavage |
| Osa-miR1861d | 21 | GGUCUUGAGGCAGGAACUGAG | Cleavage |
| Osa-miR2118a | 22 | UUCUCGAUGCCUCCCAUUCCUA | Cleavage |
| Osa-miR408 | 21 | CUGCACUGCCUCUUCCCUGGC | Translation |
| Osa-miR5833 | 21 | UCCUCCUCGGGCUCAUCGGGC | Cleavage |
| Osa-miR2118p | 22 | UUCCCGAUGCCUCCCAUGCCUA | Cleavage |
| Osa-miR5489 | 21 | CAGGUGUUCUCGAUGGCUUCC | Cleavage |
| Osa-miR5809b | 20 | UCGUCGCCGGCGACCACAGC | Cleavage |
| Osa-miRN2298a | 21 | CGGAGCAGACGGGAUCUCGAC | Cleavage |
| Osa-miRN2298b | 21 | CGGAGCAGACGGGAUCUCGAC | Cleavage |
| Osa-miRN2324 | 21 | UGGUGAUAACAGGAGCUUGGA | Translation |
| Osa-miRN2347 | 21 | UCAGCAGAAGUUUCCUGAAUC | Cleavage |
| *OsLOX10* | 6 | Osa-miRN2321 | 21 | CUGCGUUGAACUGUCGGUCAU | Translation |
| Osa-miR3980a | 21 | UGGCCGAGGCCGUCGAUUCUC | Translation |
| Osa-miR3980b | 21 | UGGCCGAGGCCGUCGAUUCUC | Translation |
| Osa-miR444a | 21 | UGCAGUUGCUGCCUCAAGCUU | Cleavage |
| Osa-miR444d | 21 | UGCAGUUGCUGCCUCAAGCUU | Cleavage |
| Osa-miR444e | 21 | UGCAGUUGCUGCCUCAAGCUU | Cleavage |
| *OsLOX11* | 8 | Osa-miR172a | 21 | AGAAUCUUGAUGAUGCUGCAU | Cleavage |
| Osa-miR172d | 21 | AGAAUCUUGAUGAUGCUGCAU | Cleavage |
| Osa-miR5489 | 21 | CAGGUGUUCUCGAUGGCUUCC | Cleavage |
| Osa-miR172c | 21 | UGAAUCUUGAUGAUGCUGCAC | Cleavage |
| Osa-miR1427 | 21 | UGCGGAACCGUGCGGUGGCGC | Cleavage |
| Osa-miR172b | 20 | GAAUCUUGAUGAUGCUGCAU | Cleavage |
| Osa-miRN2286 | 21 | UUGAACAAACUAAGGAGAGCU | Translation |
| Osa-miRN2370 | 21 | UUGGGGAACGCGCCGAUCGUC | Cleavage |
| *OsLOX12* | 1 | Osa-miRN2370 | 21 | UUGGGGAACGCGCCGAUCGUC | Cleavage |
