# Supplementary material for: Genome-Wide Identification and Expression Analysis of LOX Gene Family in Rice (Oryza sativa L.) Under Abiotic Stress Conditions
Source: Research Square preprint supplement (doi:10.21203/rs.3.rs-8728944/v1), 2026-02-24
Supplement: Supplementary file 3 [file 315e45b9d66662a9b3b00765.docx]

**Table S1.** Primer list for real-time quantitative PCR analysis

| Gene | Orientation | Primer Sequence (5’ - 3’) | Amplicon size (bp) |
| --- | --- | --- | --- |
| *OsLOX1* | Forward | CCTCCACCTCCACCAACATC | 216 |
| Reverse | GCTTGCTCACGATGGGAAAC |
| *OsLOX2* | Forward | CGGCACAACAGGGAGTTCT | 220 |
| Reverse | TGCCATCTCCTCTTAGGTCT |
| *OsLOX3* | Forward | GGAGTACACAGAGCTGGACG | 170 |
| Reverse | CCTTGGGGTCTGATGTCCAC |
| *OsLOX4* | Forward | CAGCAAGATCACCGAAGCTC | 197 |
| Reverse | TCAGGGTGCCATCGTCCTT |
| *OsLOX5* | Forward | GAGAGTCCAAGTTCGGGGTG | 184 |
| Reverse | TACTTGGAGGCGGGGTAGAT |
| *OsLOX6* | Forward | GTACACGCTCAAGATCAACGC | 205 |
| Reverse | GTGGTCACTGCAAGAACGCA |
| *OsLOX7* | Forward | ATGTCGCCGTCAACGATTCT | 173 |
| Reverse | GGCCAAGGTGTTGATCTGC |
| *OsLOX8* | Forward | ACCGGAAGAATGACCTCCAG | 164 |
| Reverse | AGGGTAGGGGAACTGCTTGT |
| *OsLOX9* | Forward | AATCCATCGTCCAGCCACC | 186 |
| Reverse | GCACCTCACAACAACTCGCT |
| *OsLOX10* | Forward | TGCAGTCGTGGTGGAAAGAT | 162 |
| Reverse | TGTACTGGCCGAAGTTGACG |
| *OsLOX11* | Forward | ACCAAGAACAGACGACCGAC | 190 |
| Reverse | TCCGTGTGCATCCCCTCTAT |
| *OsLOX12* | Forward | TATCCACTCCCGAGAAGGTG | 164 |
