# Supplementary material for: Genome-Wide Identification and Expression Analysis of LOX Gene Family in Rice (Oryza sativa L.) Under Abiotic Stress Conditions
Source: Research Square preprint supplement (doi:10.21203/rs.3.rs-8728944/v1), 2026-02-24
Supplement: Supplementary file 5 [file 71cb5259d8bdab6b10d5a591.docx]

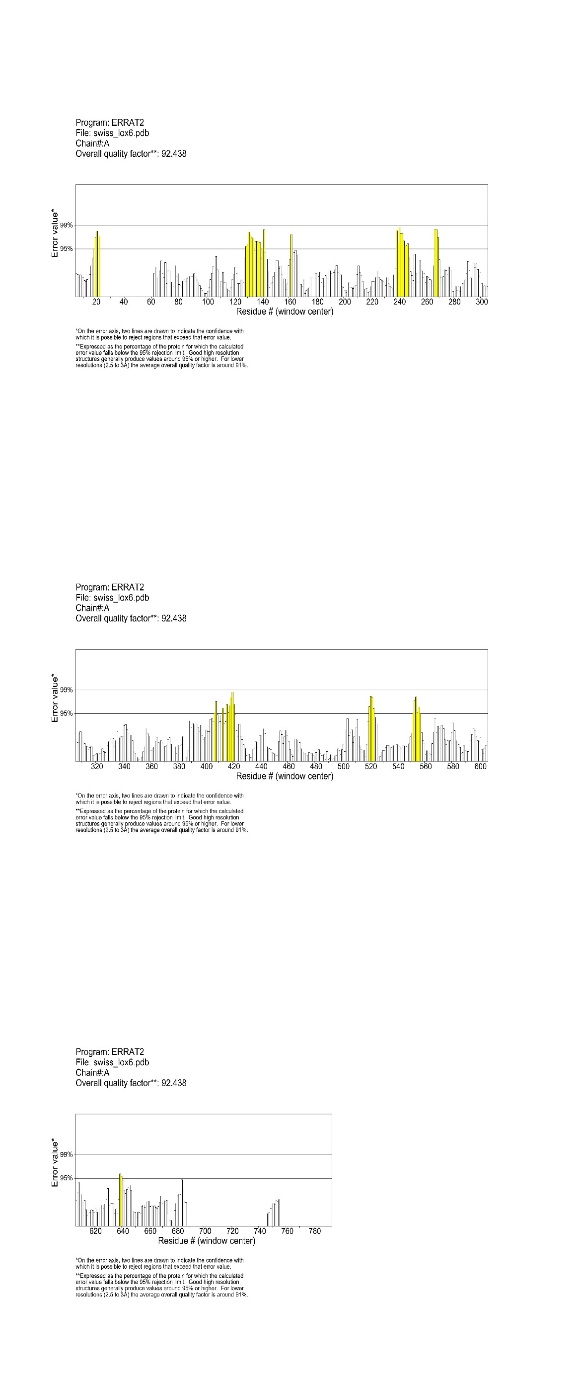


**OsLOX1**


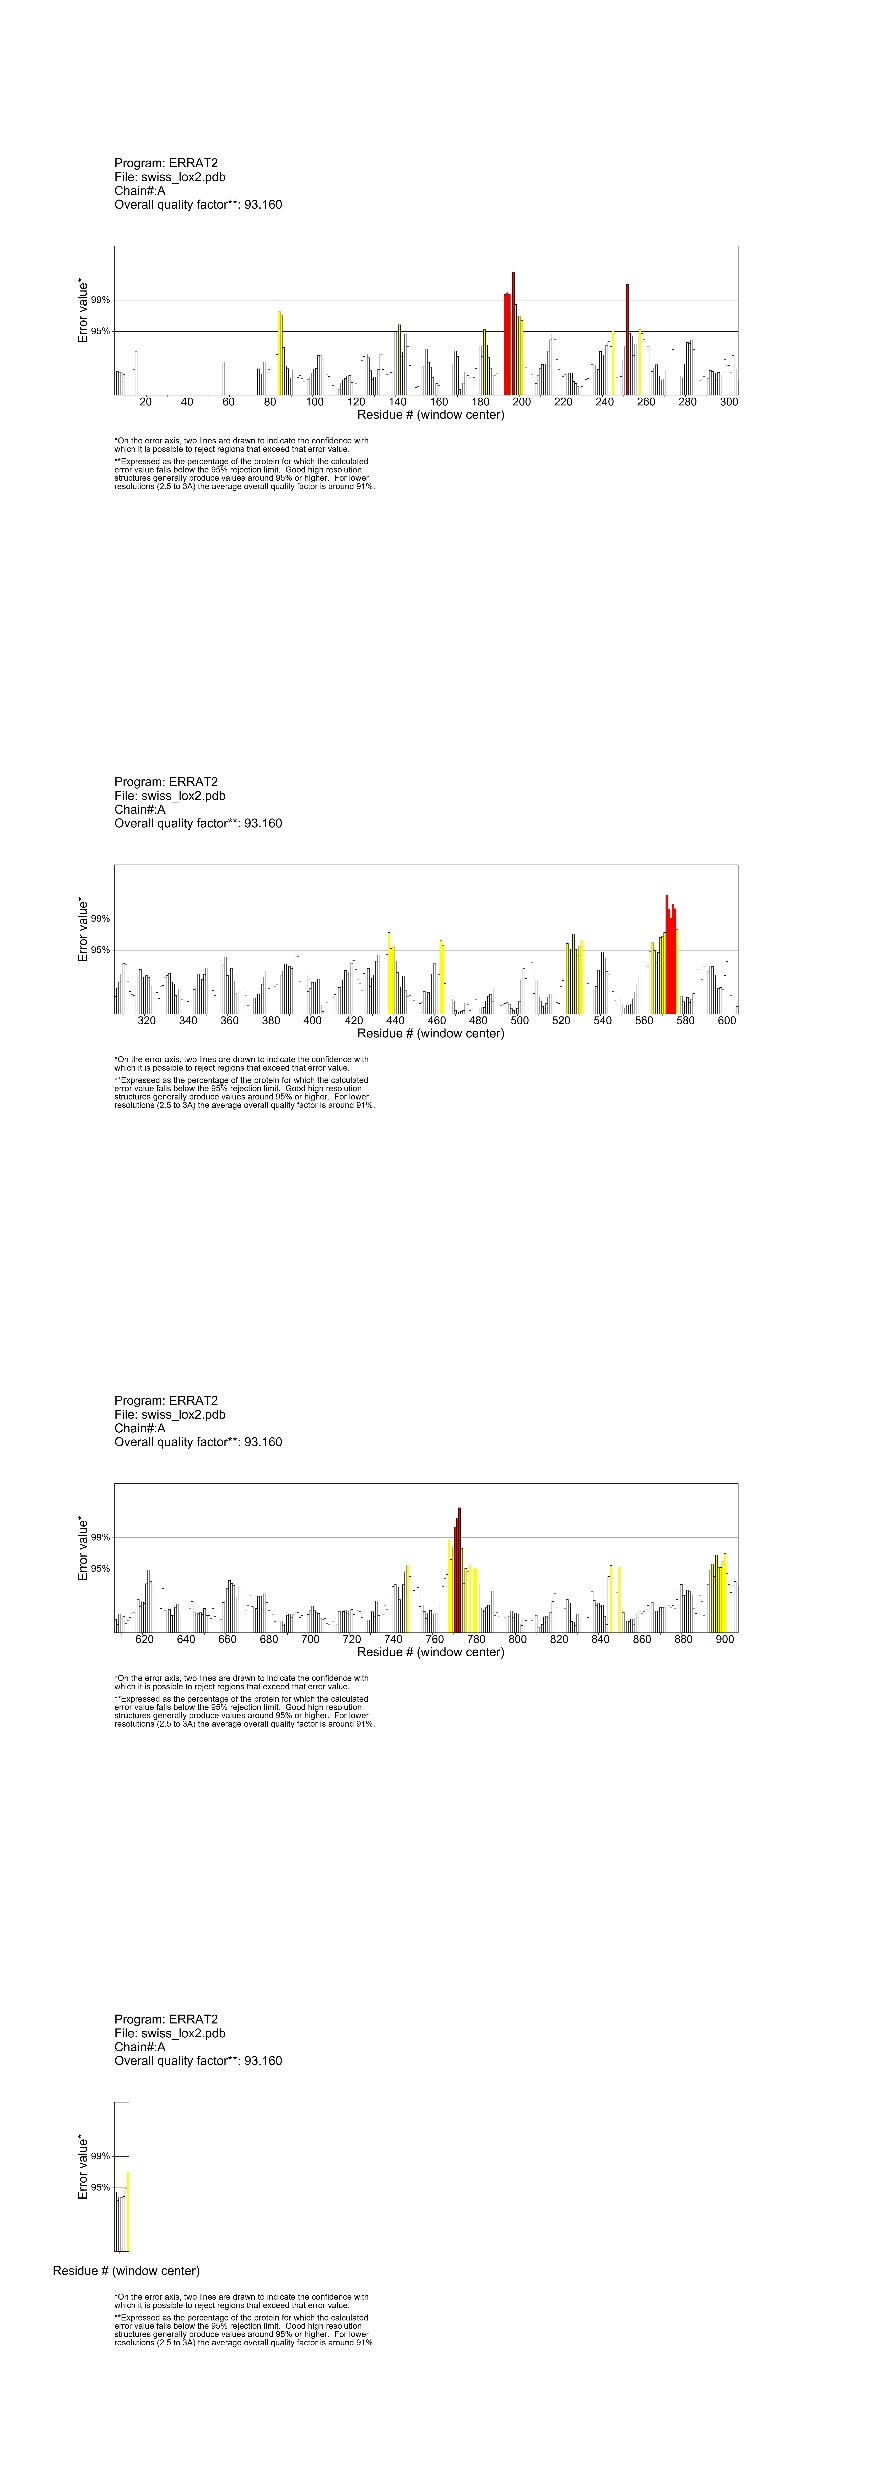


**OsLOX2**


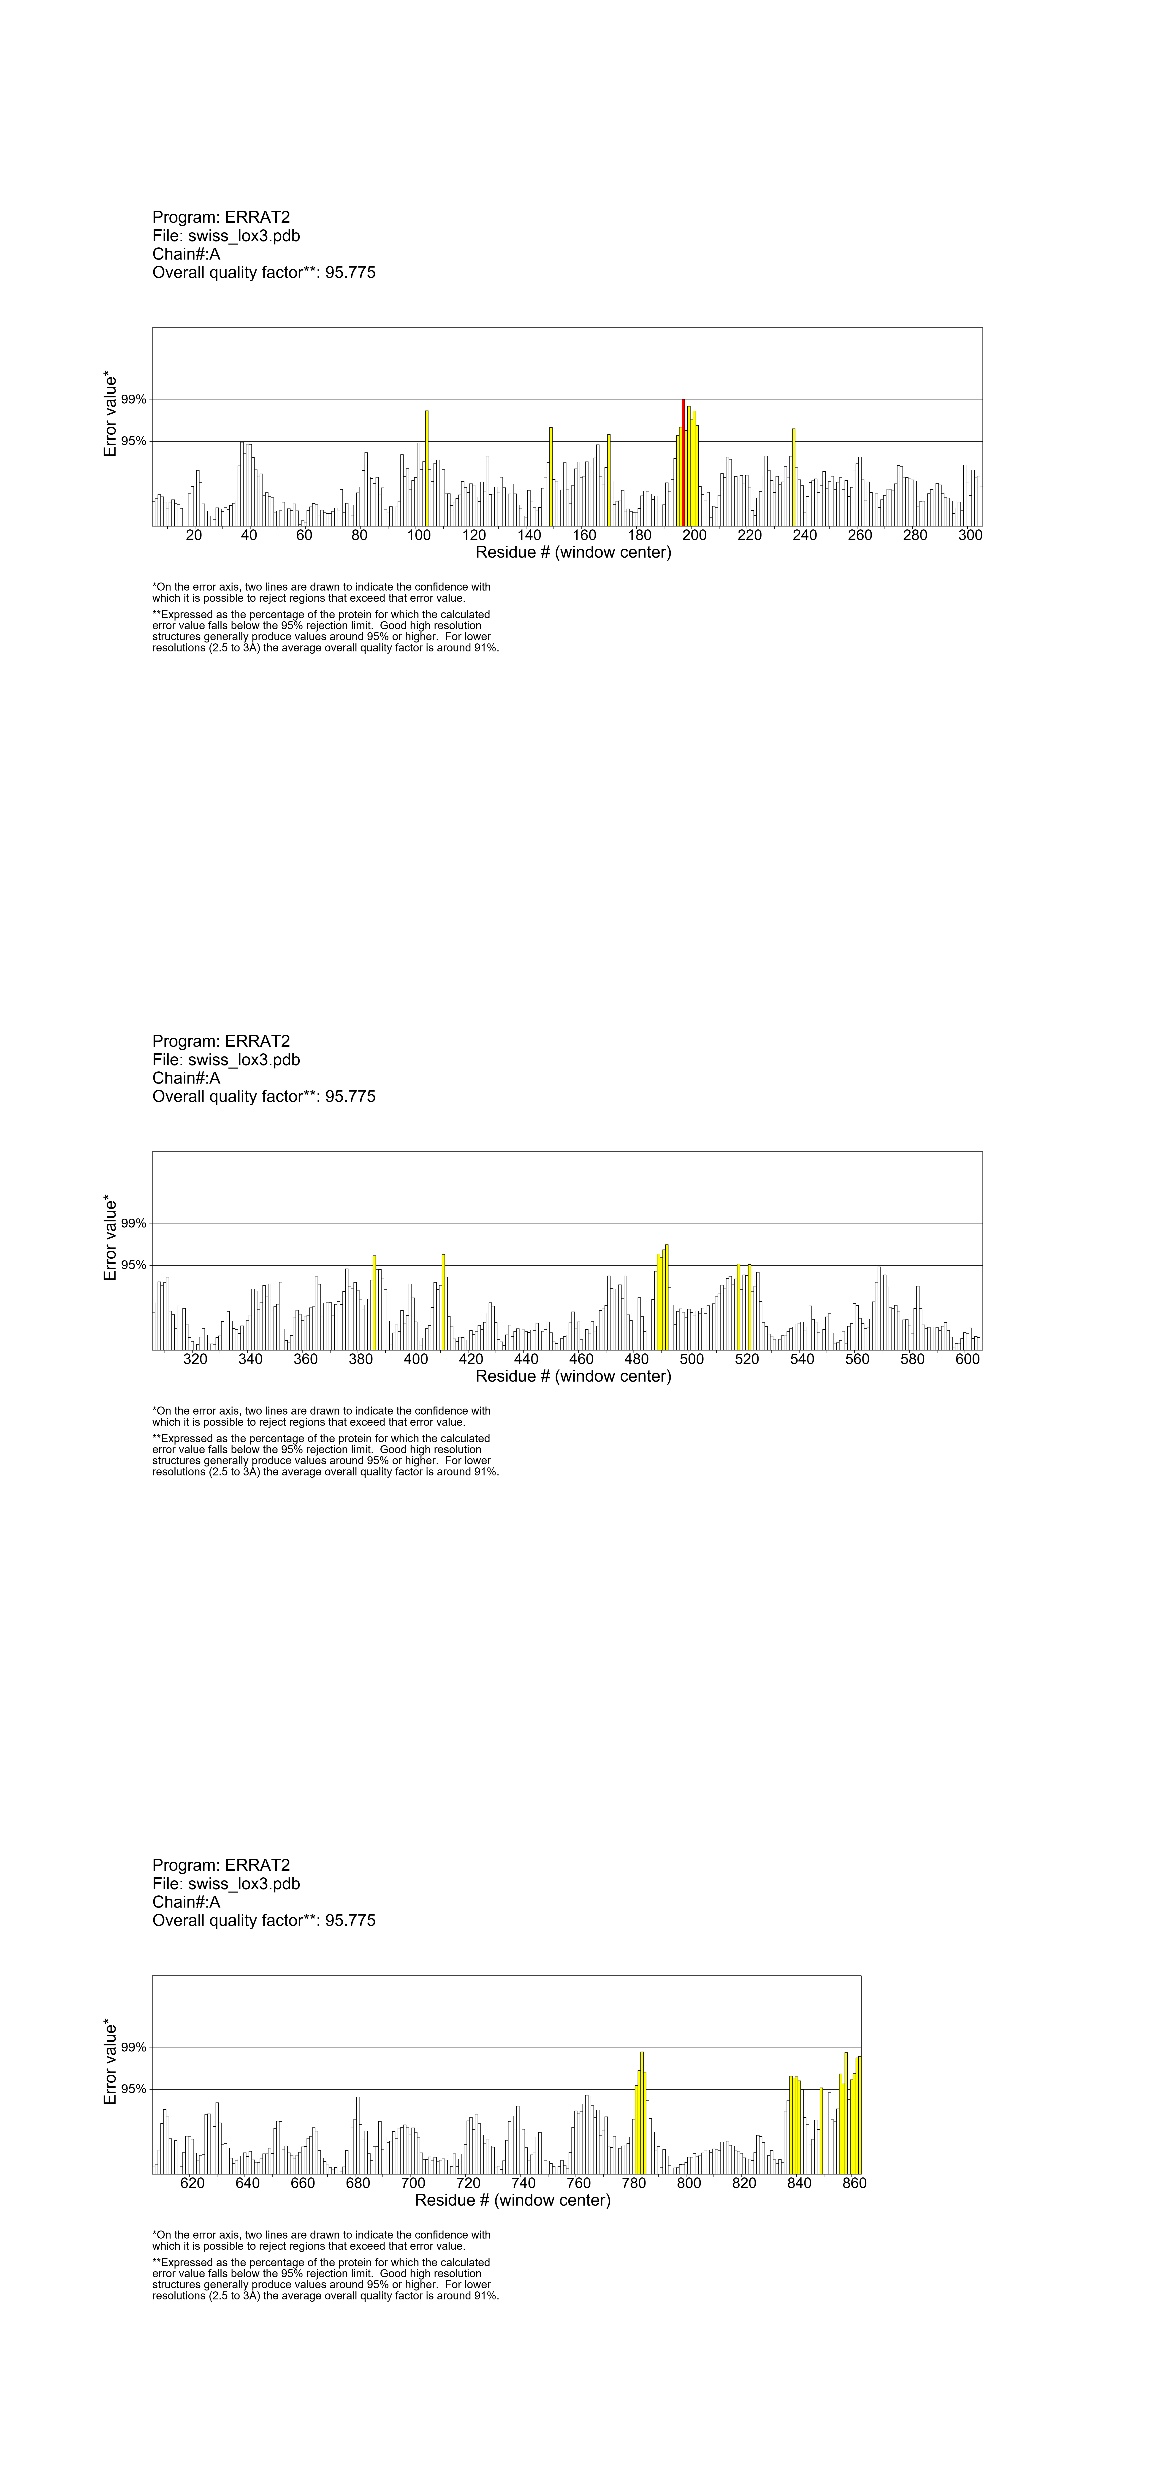


**OsLOX3**


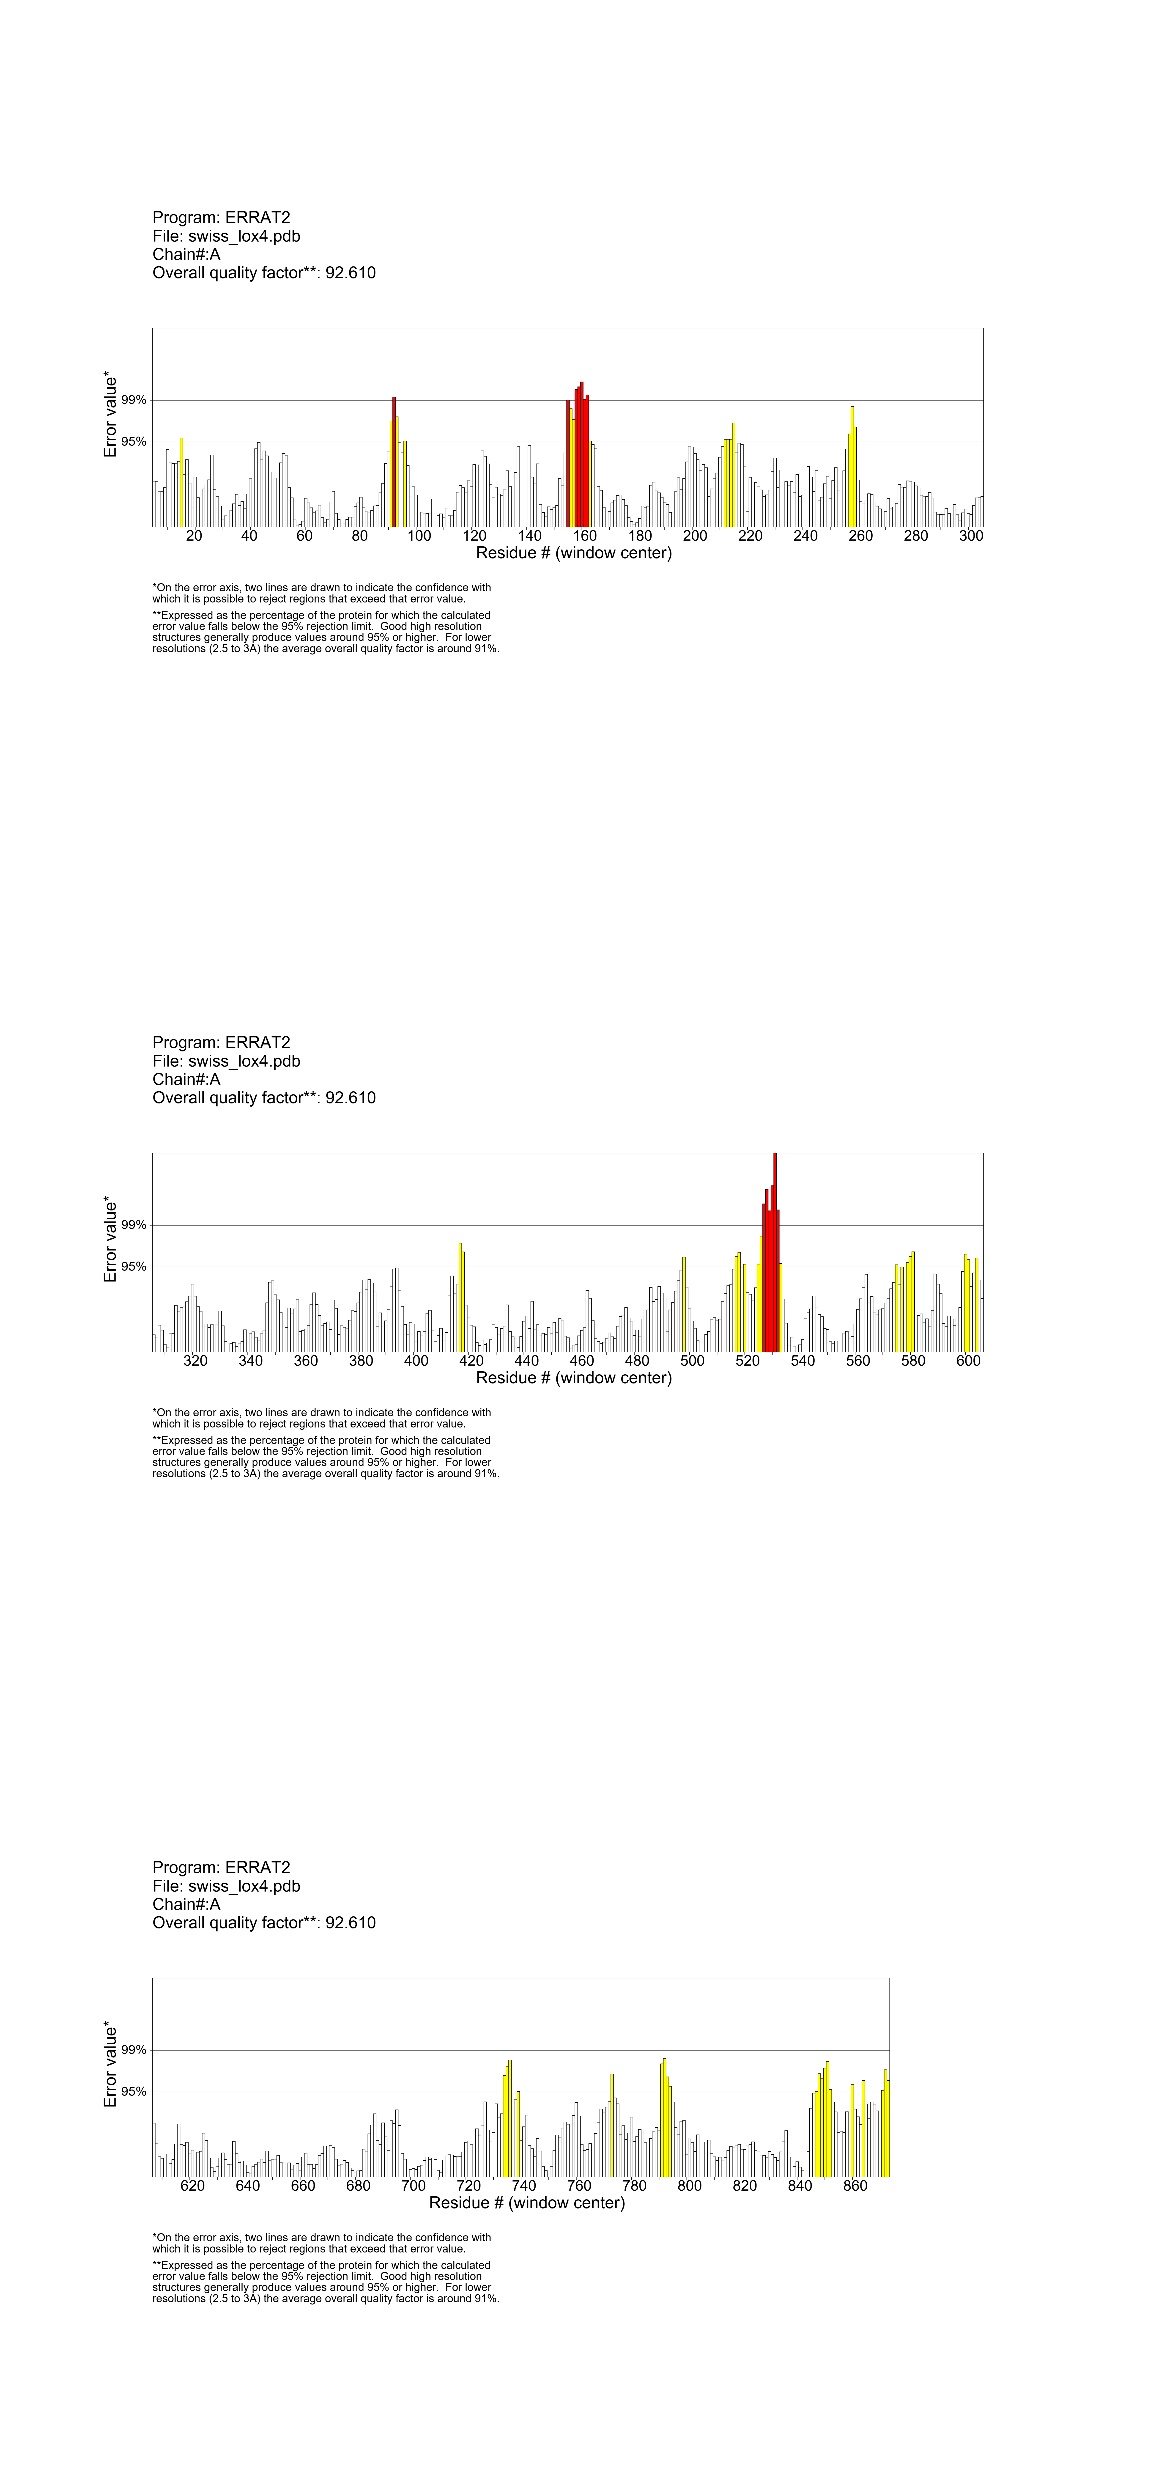


**OsLOX4**


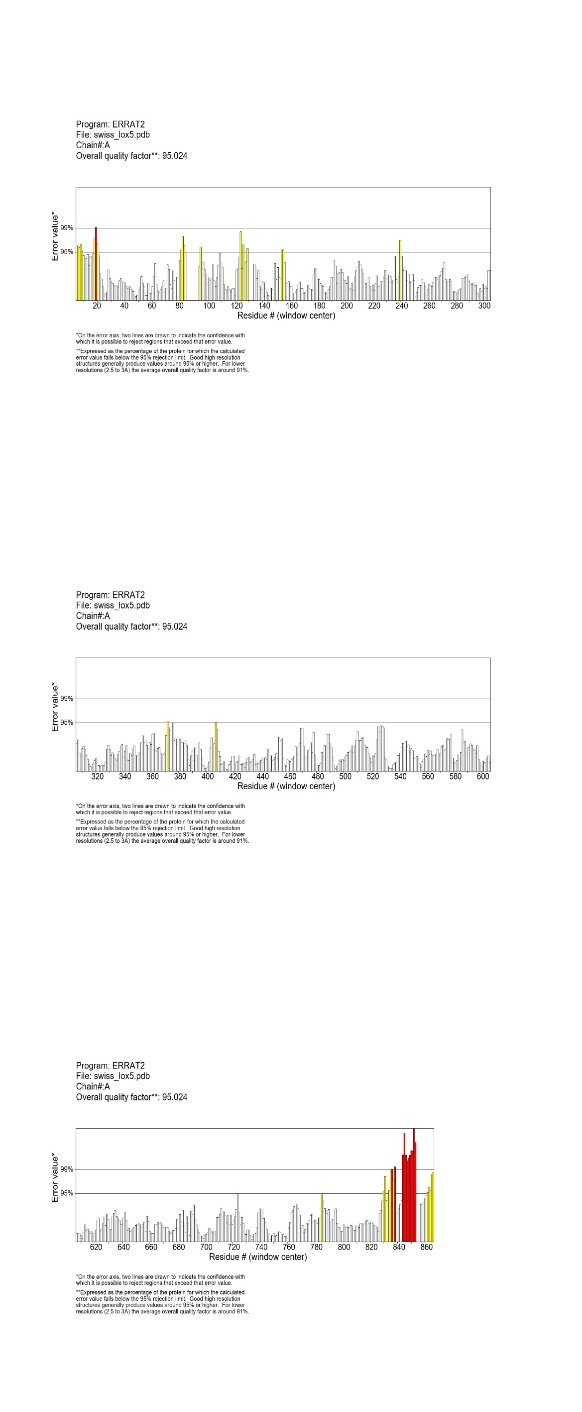


**OsLOX5**


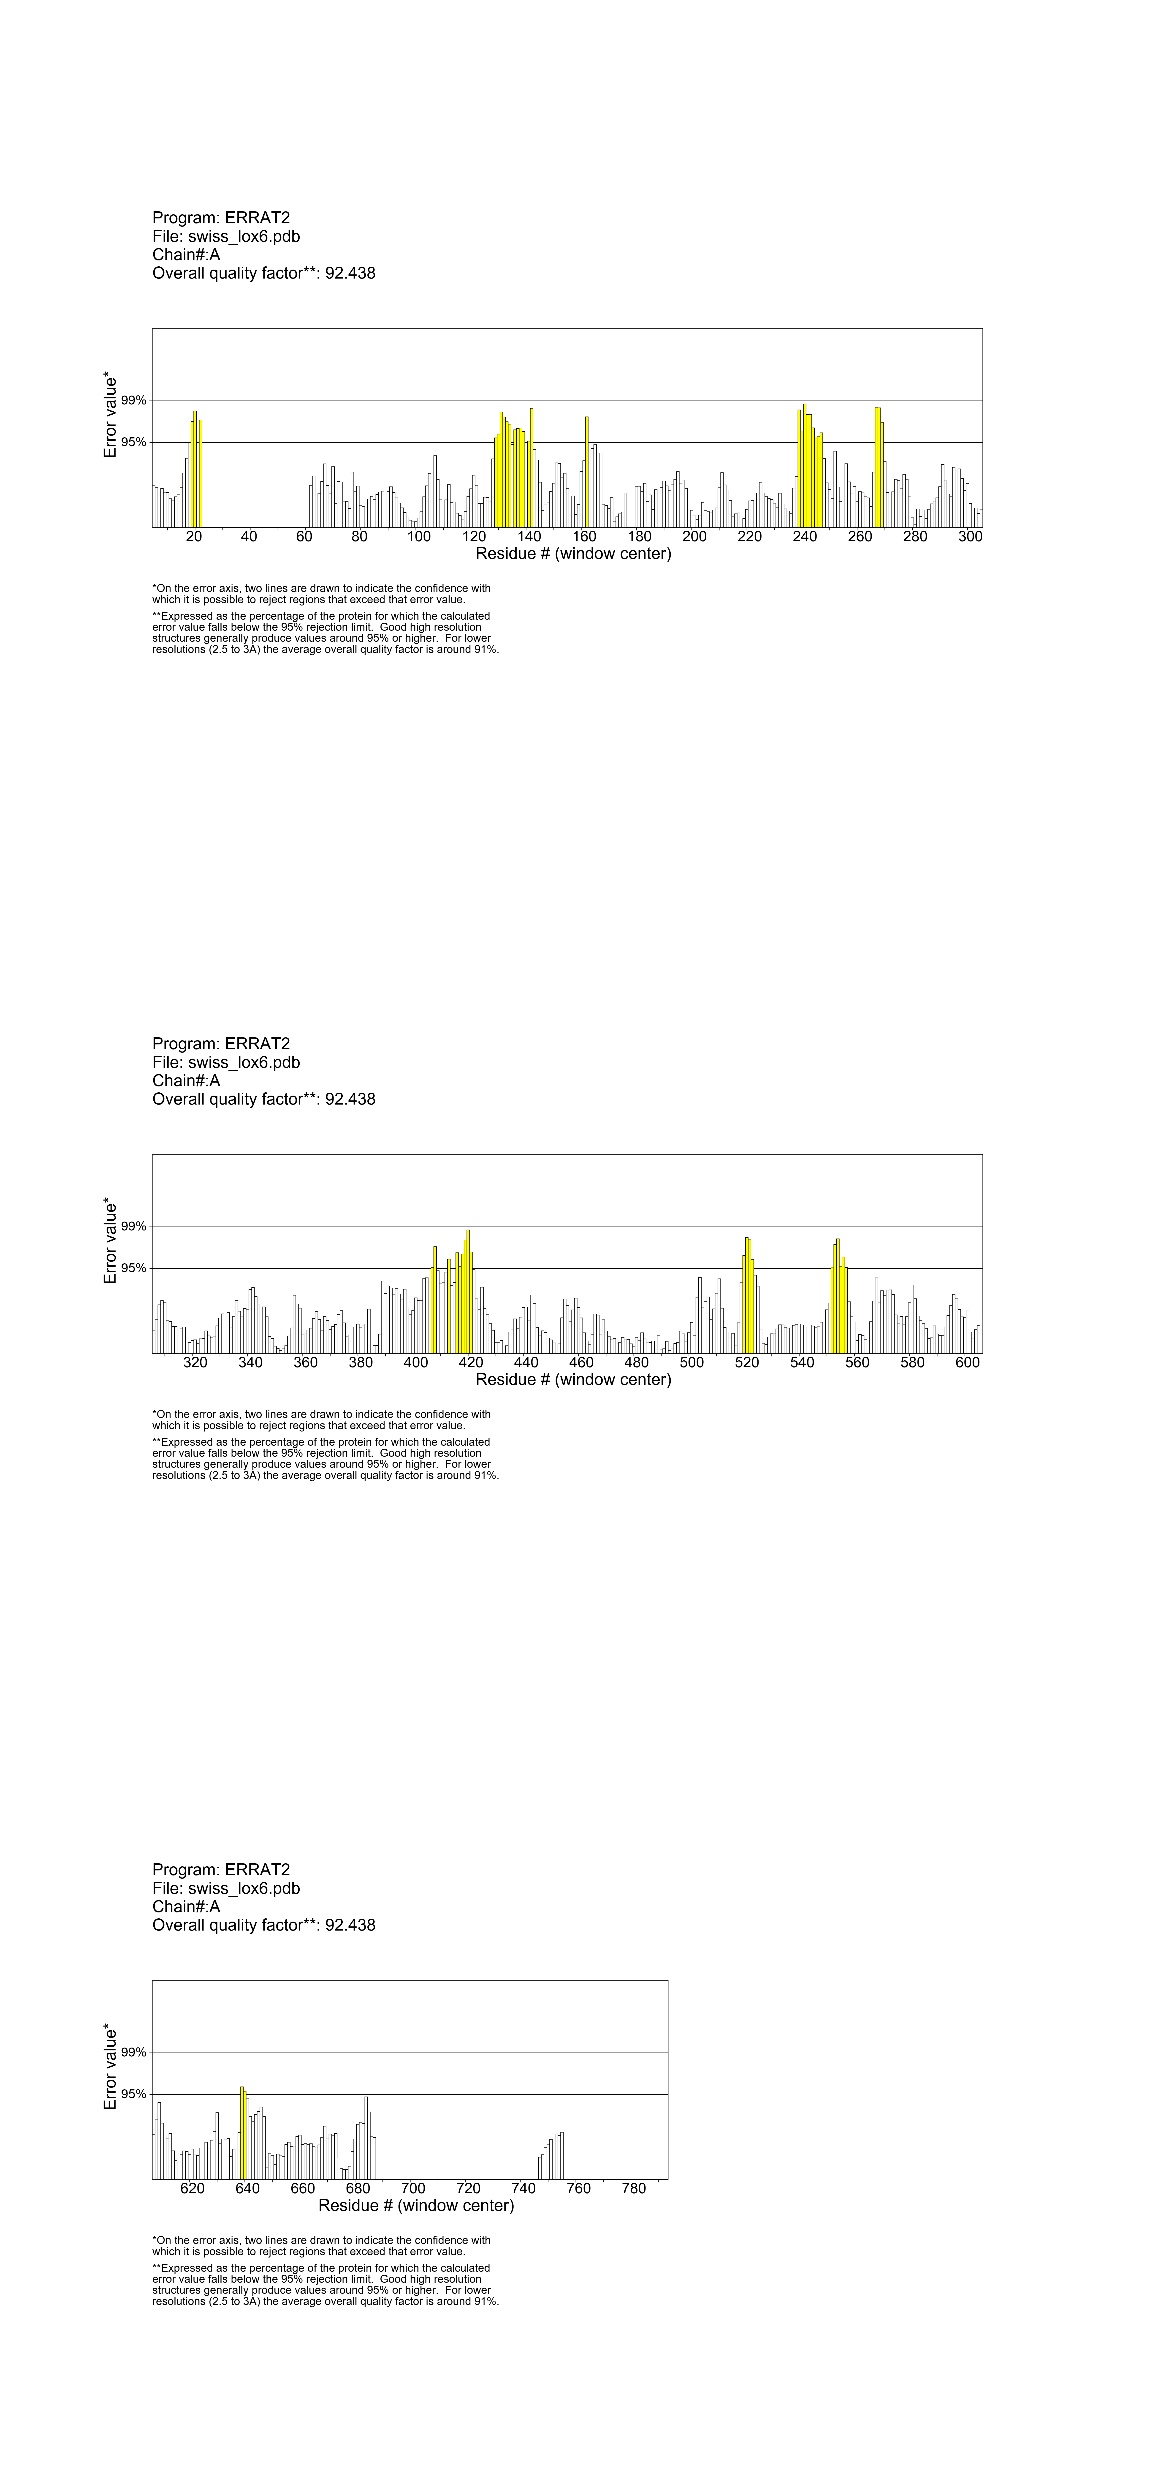


**OsLOX6**


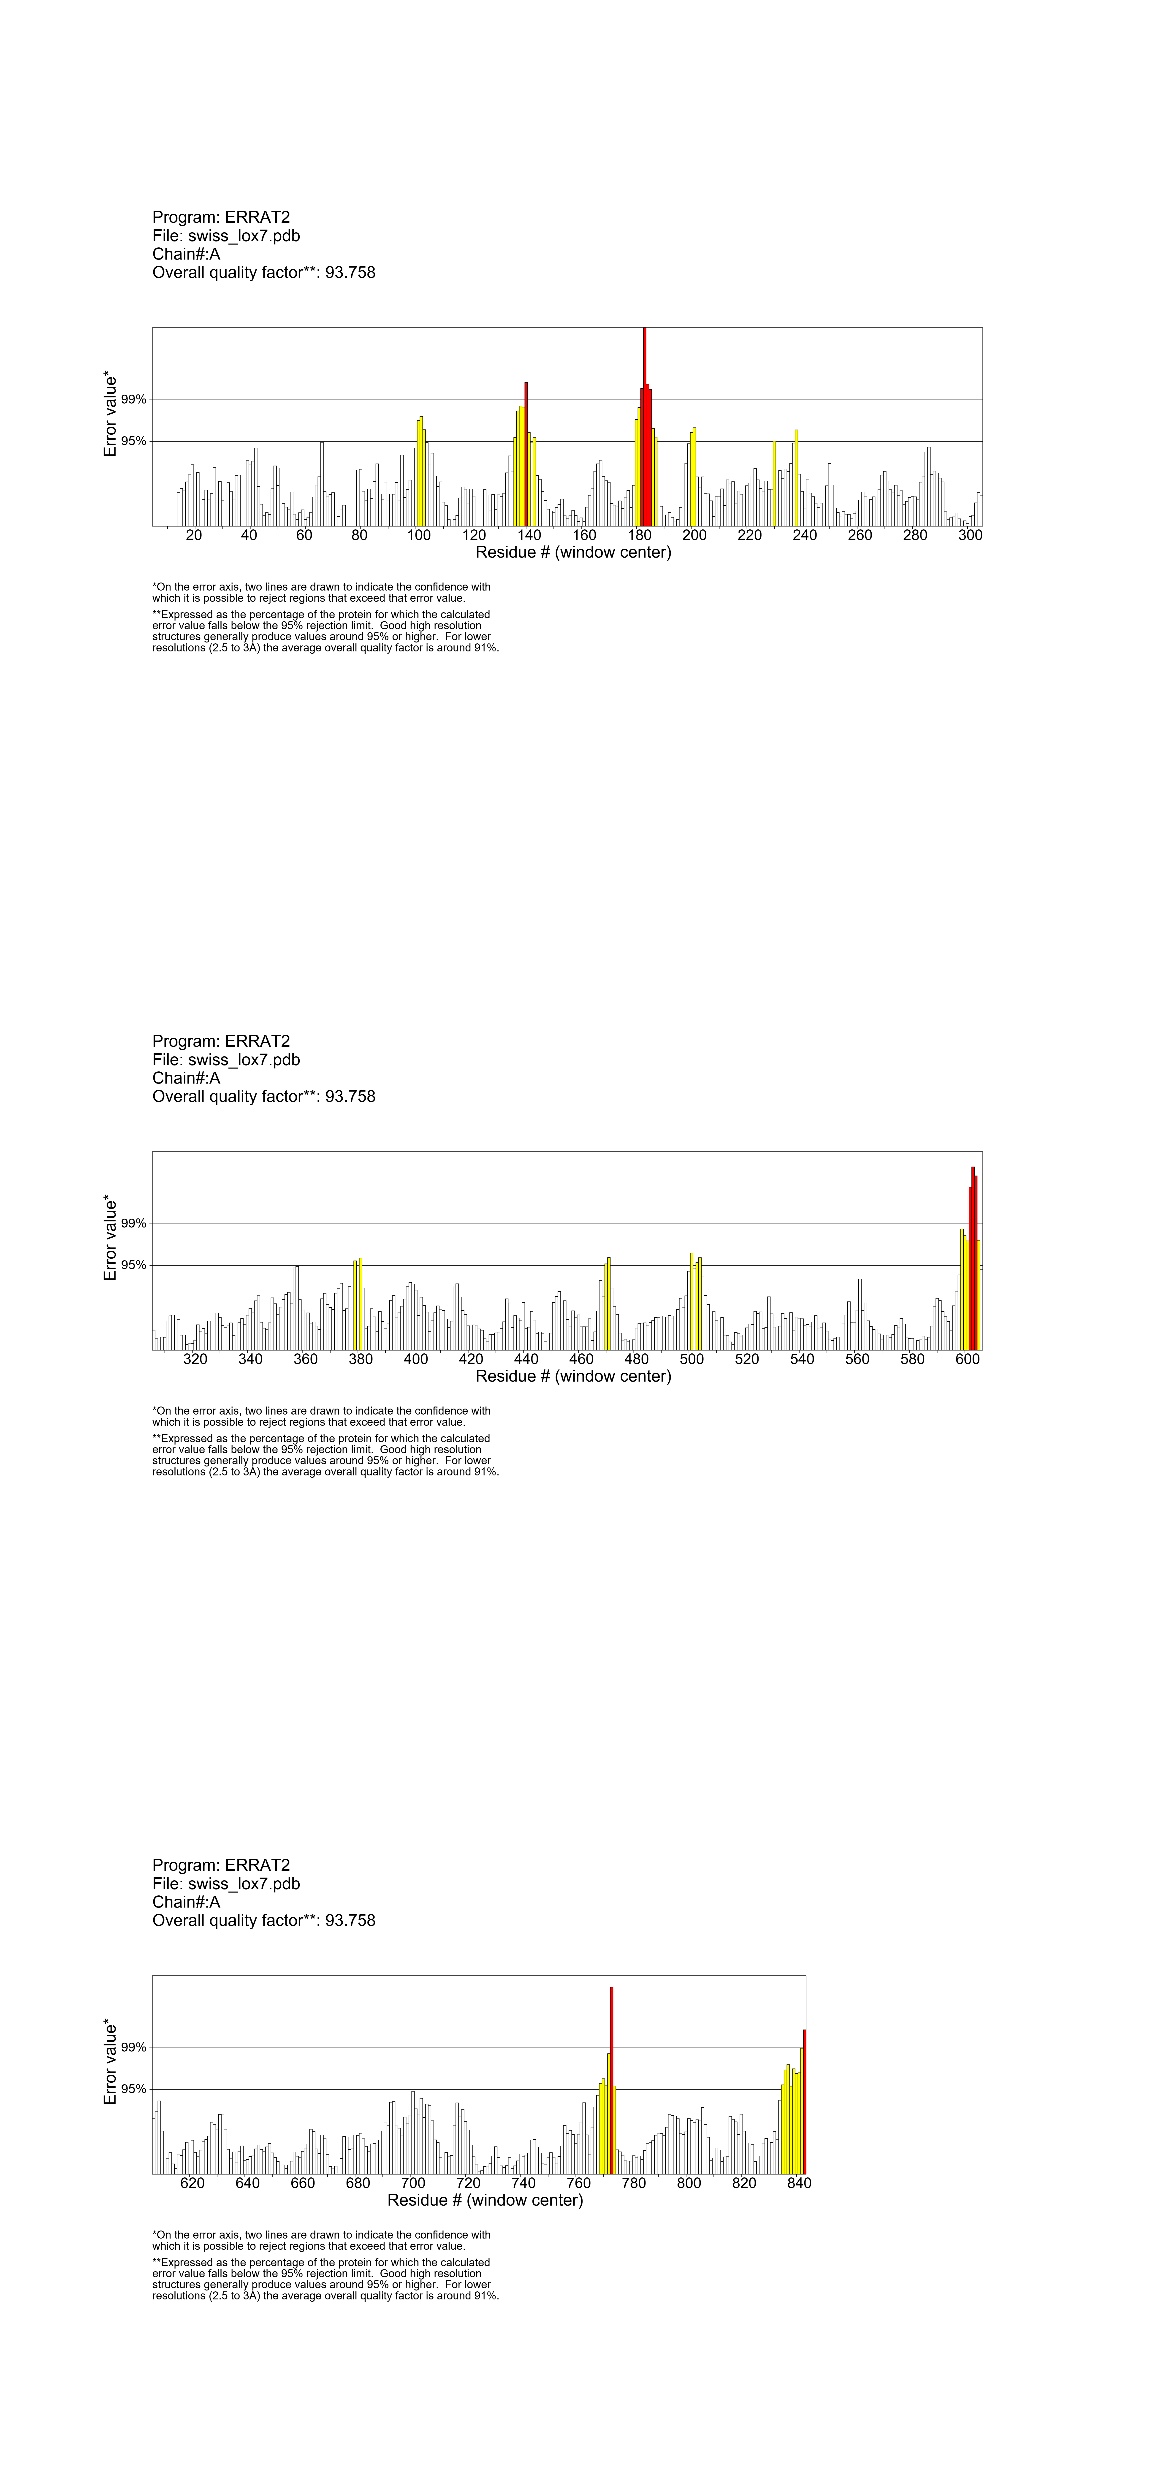


**OsLOX7**


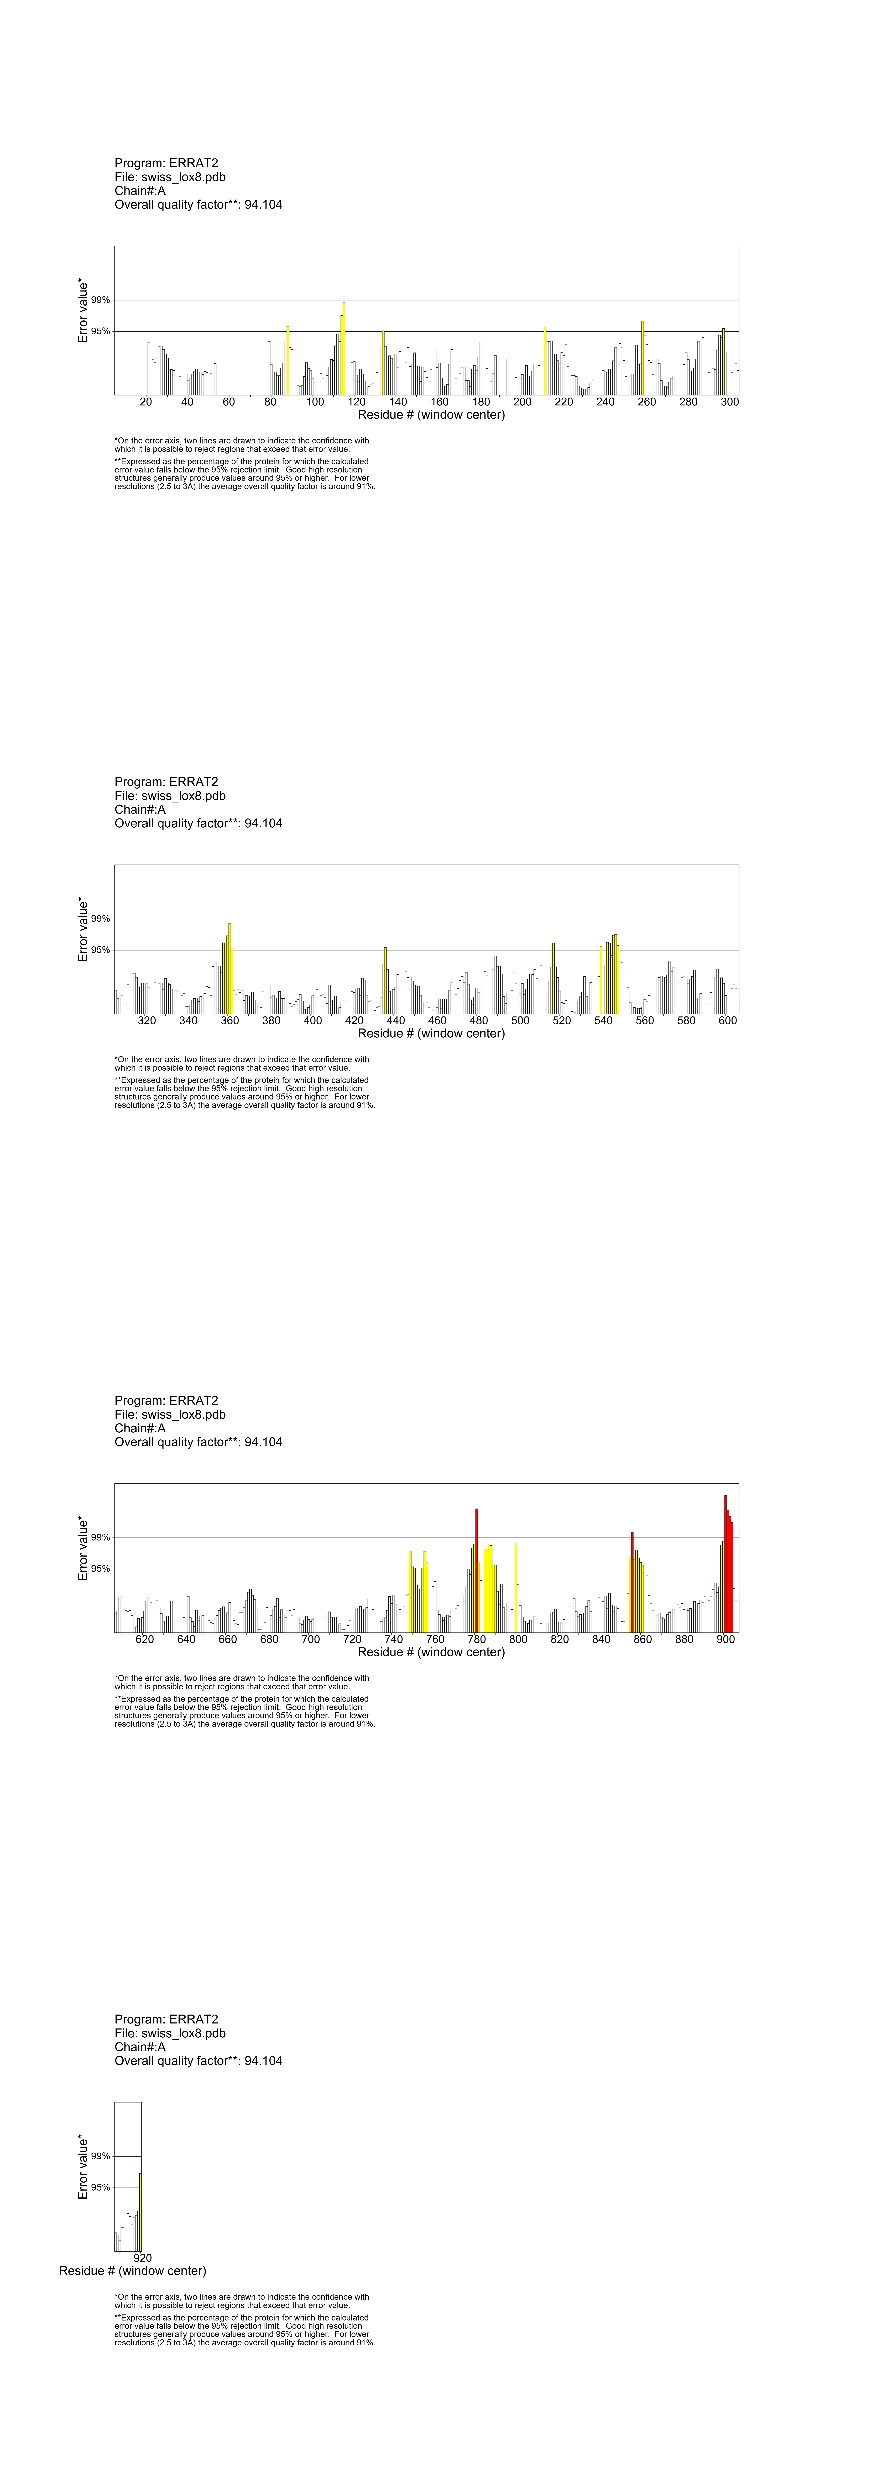


**OsLOX8**


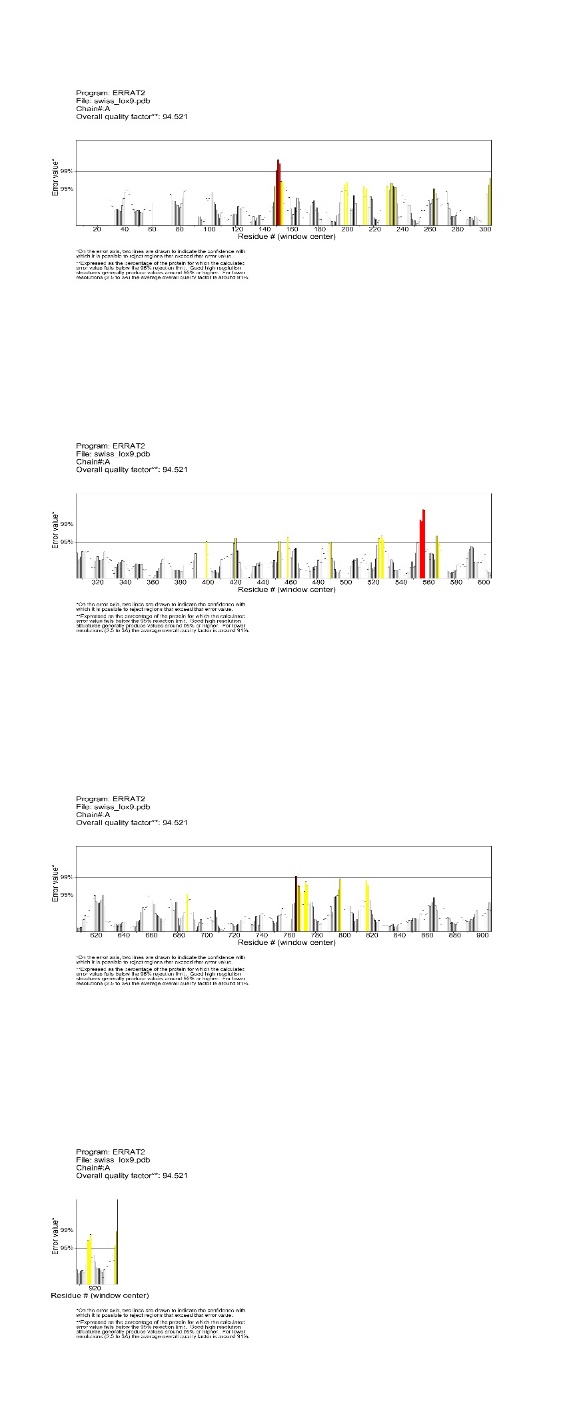


**OsLOX9**


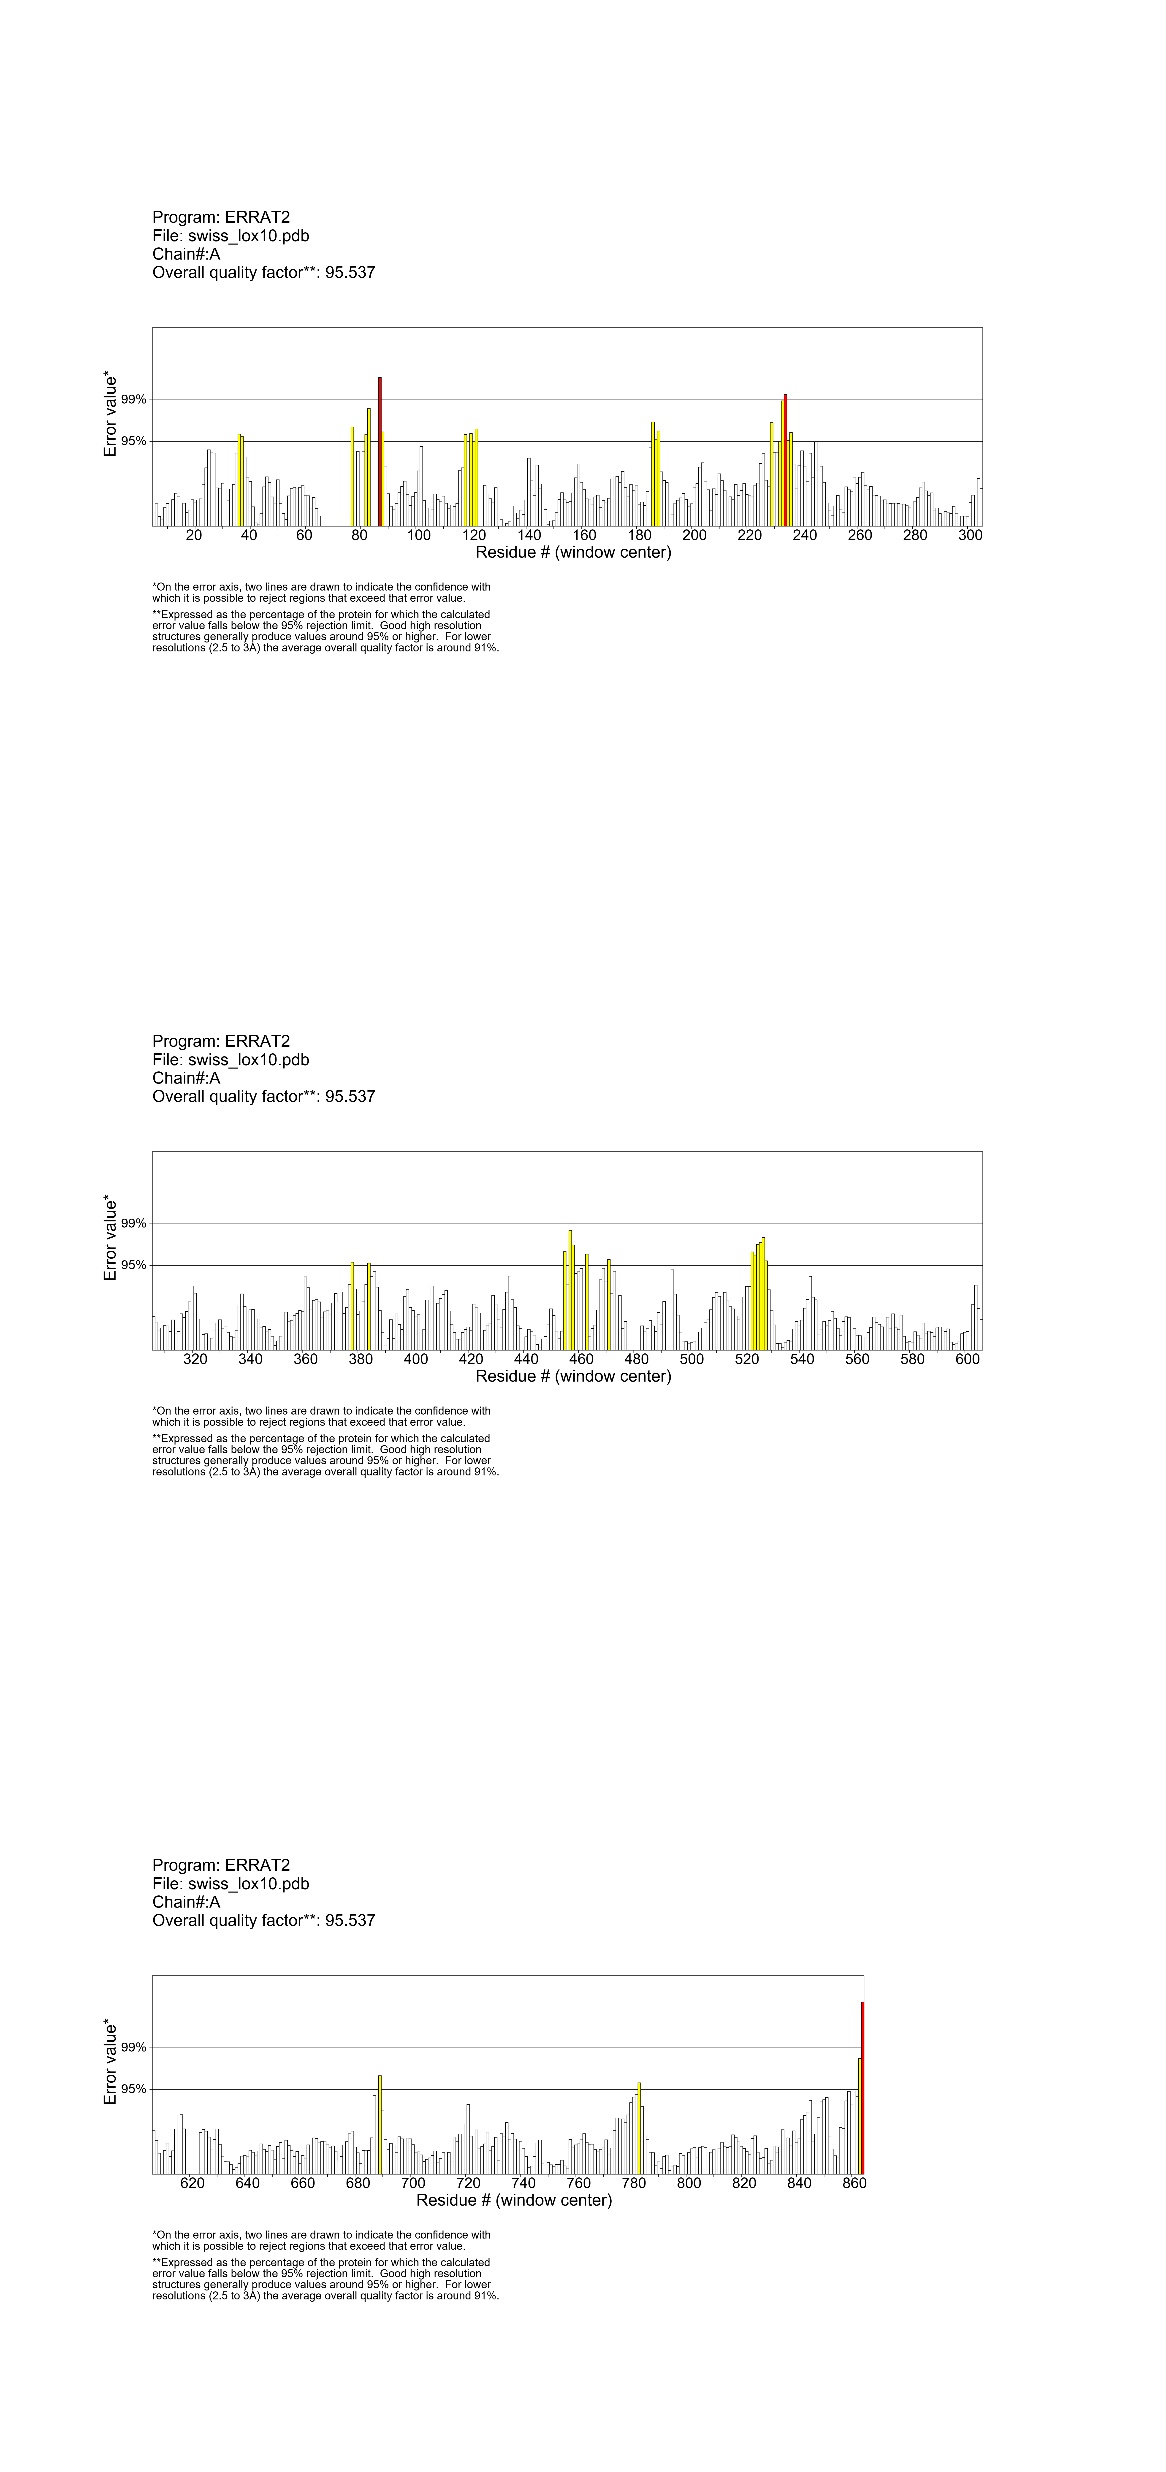


**OsLOX10**


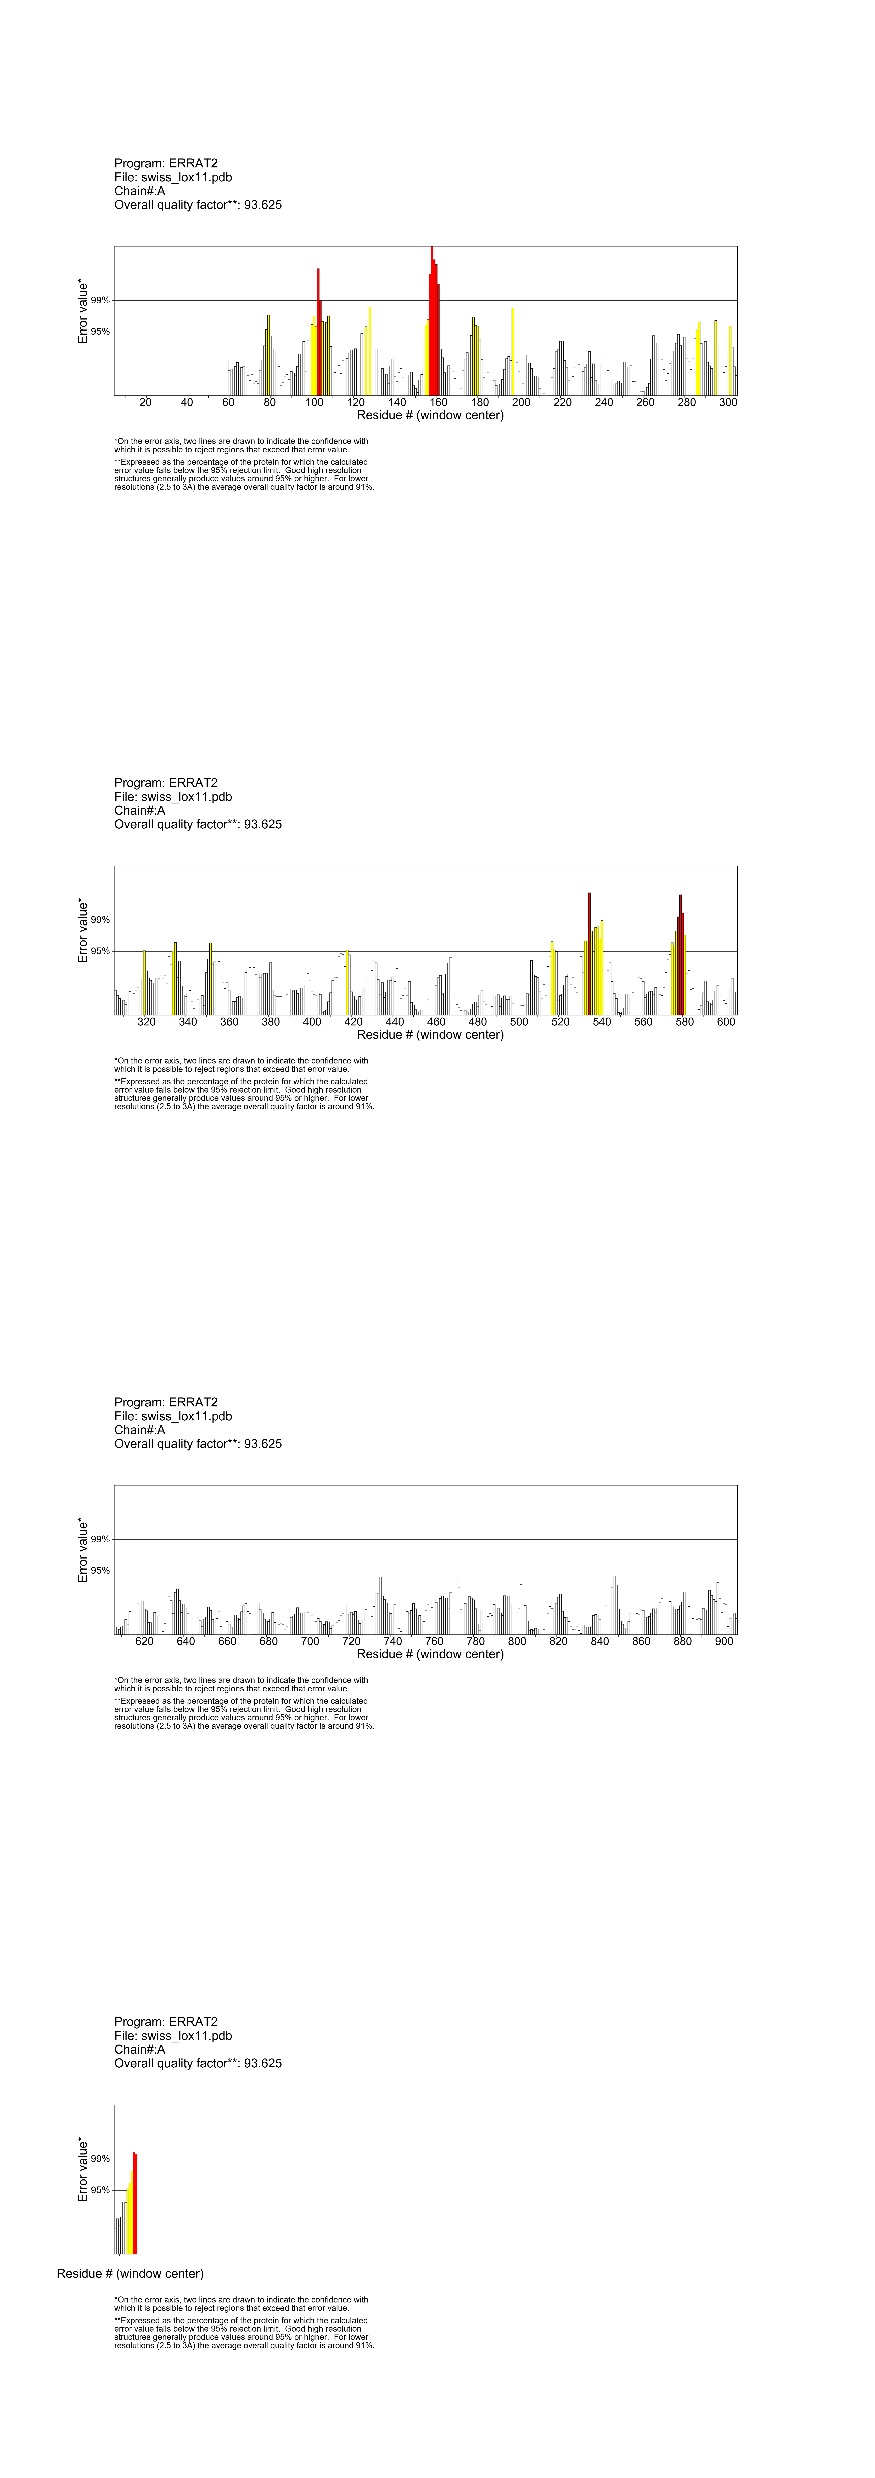


**OsLOX11**


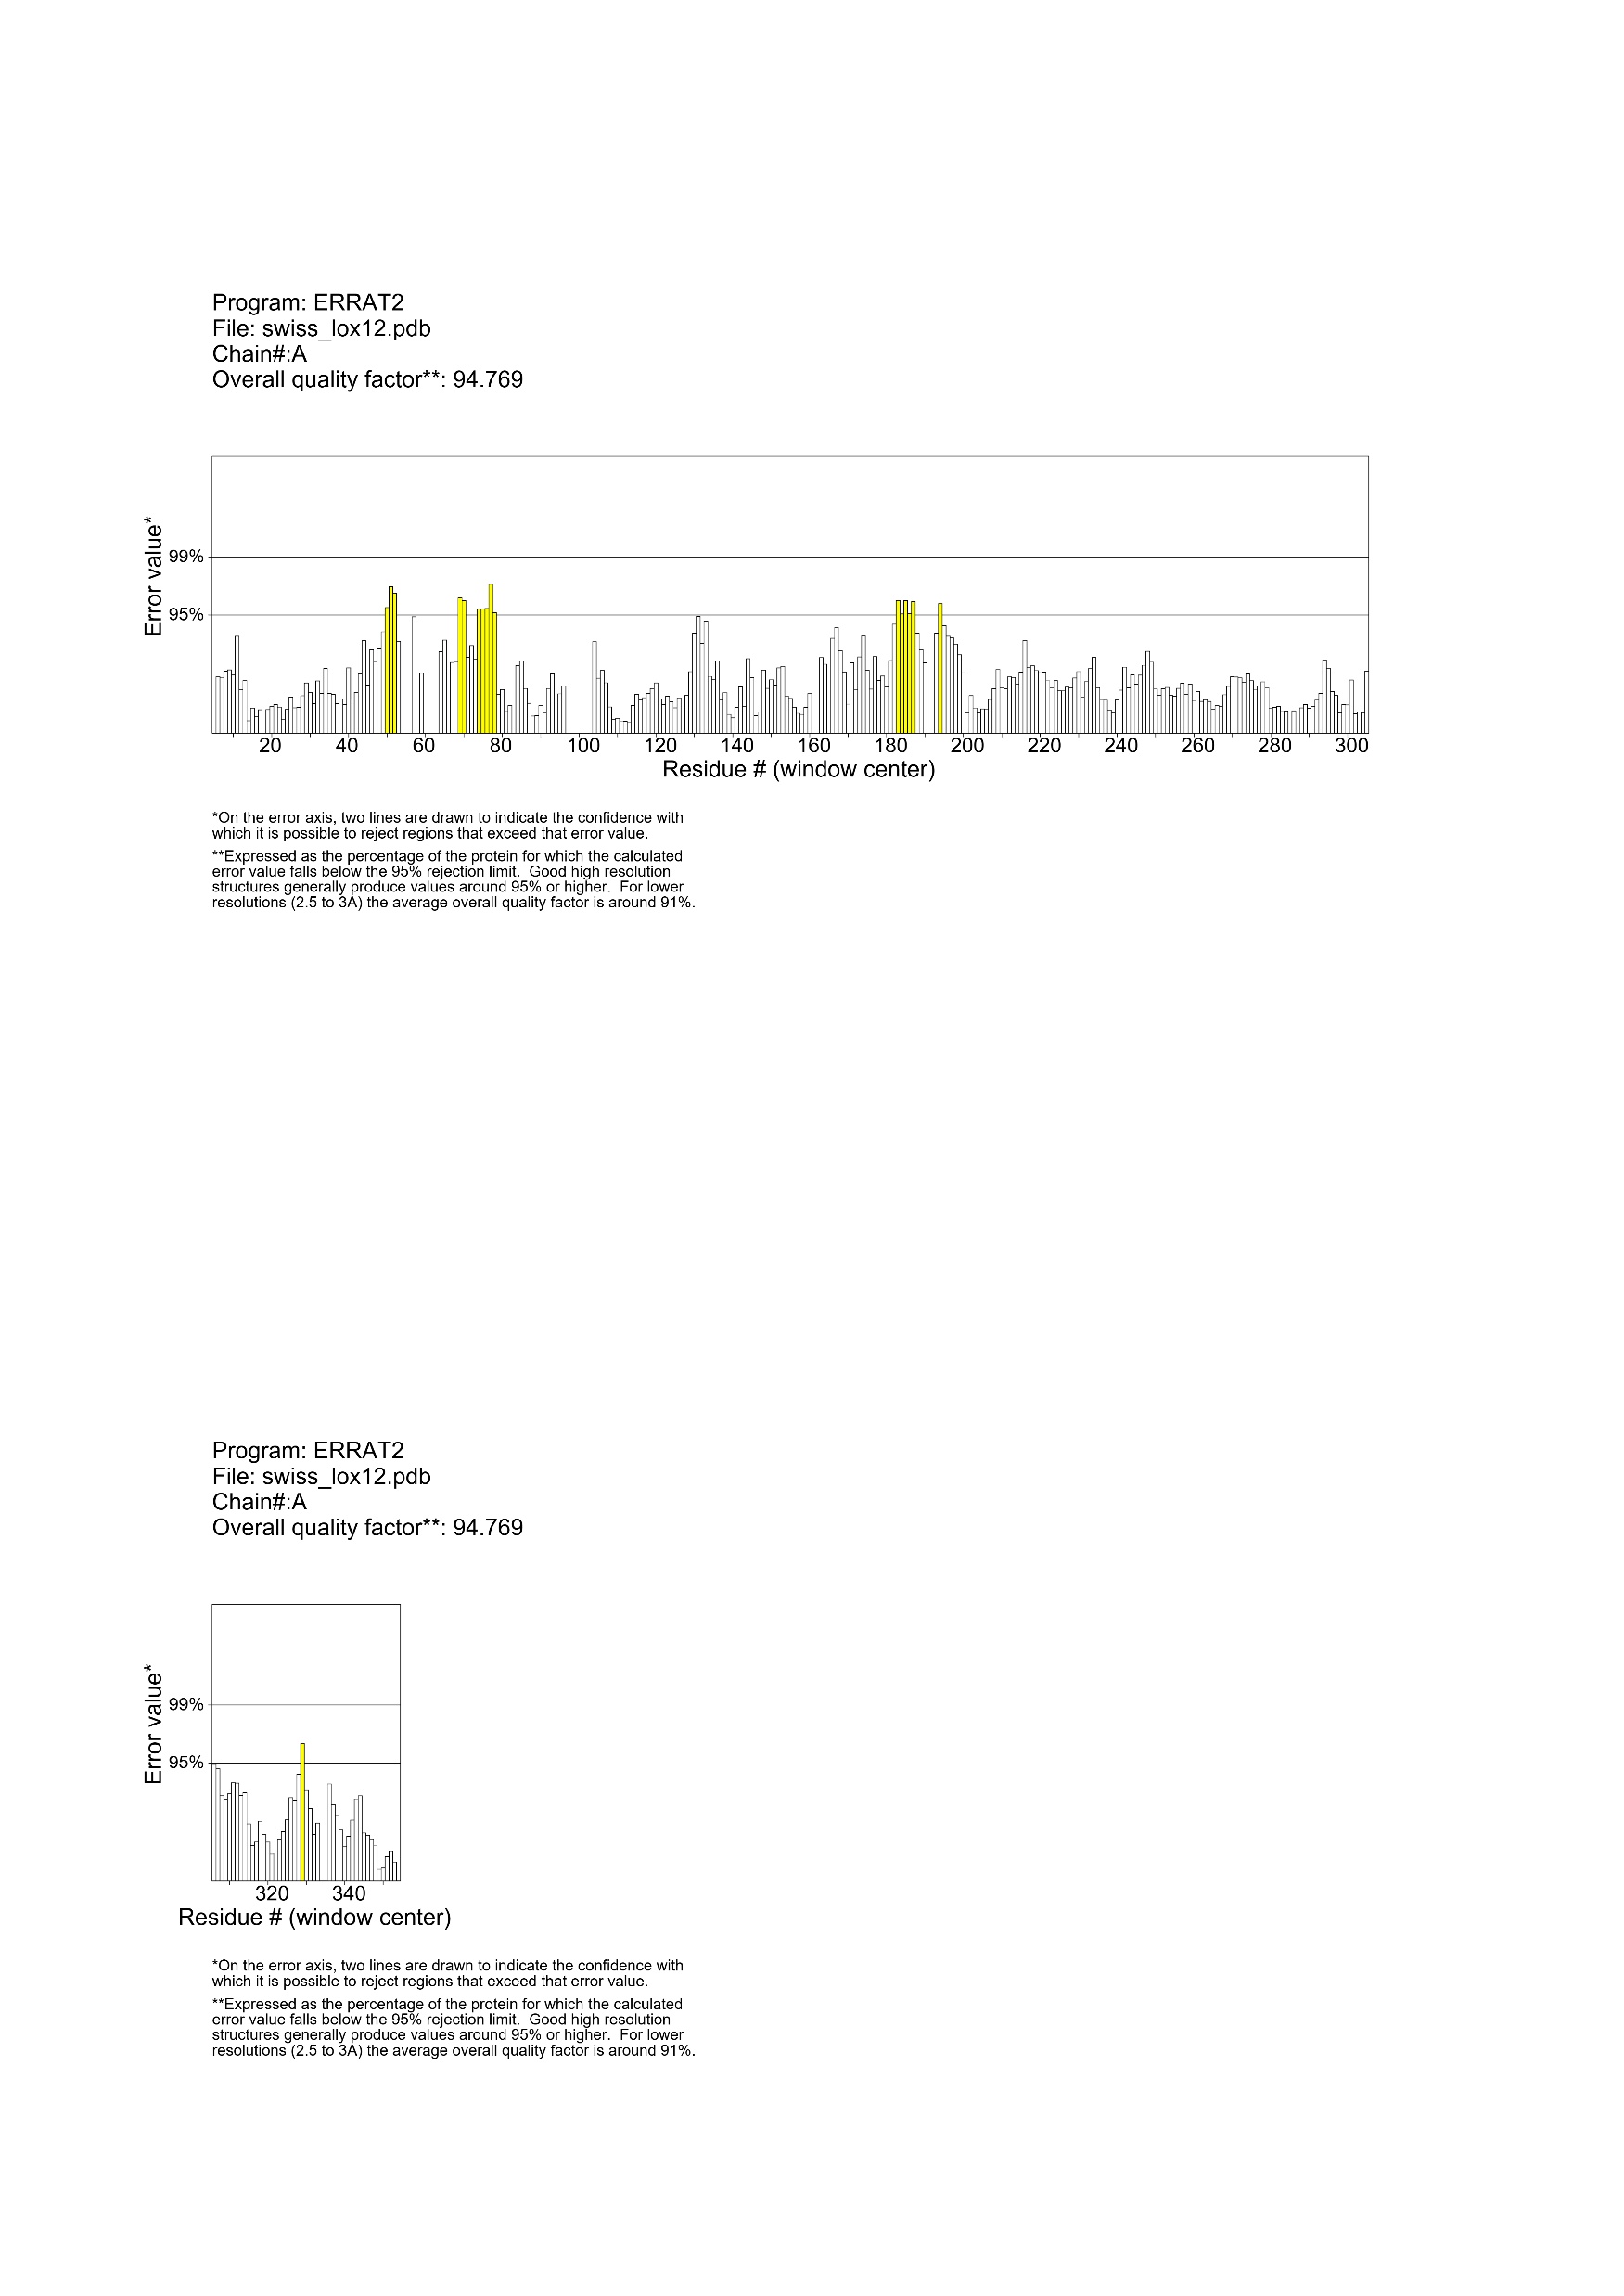


**OsLOX12**

**Figure S3.** ERRAT plot of the 3D structures of OsLOXs. The plot was generated via the ERRAT server. Proteins that are capable of being excluded with a 95% confidence level are indicated by yellow bars, while those with a 99% confidence level are indicated by red bars. The segment with the least error rate is indicated by white bars.
