# Supplementary material for: Genome-Wide Identification and Expression Analysis of LOX Gene Family in Rice (Oryza sativa L.) Under Abiotic Stress Conditions
Source: Research Square preprint supplement (doi:10.21203/rs.3.rs-8728944/v1), 2026-02-24
Supplement: Supplementary file 6 [file 7300c8216739ab308e7863f6.docx]

**Table S9.** Secondary structure analysis of the OsLOX proteins in rice.

| **Protein Name** | **Alpha-Helix (%)** | **Beta-sheet (%)** | **Isolated Beta Bridge (%)** | **Turn (%)** | **Coil (%)** | **3-10 Helix (%)** | **Membrane spanning motif (MSM)** | **Position of Motif(s) (bp)** |
| --- | --- | --- | --- | --- | --- | --- | --- | --- |
| OsLOX1 | 0.03 | 0.11 | 0.02 | 0.31 | 0.22 | 0.31 | 0 | N/A |
| OsLOX2 | 0.38 | 0.12 | 0.02 | 0.22 | 0.23 | 0.03 | 0 | N/A |
| OsLOX3 | 0.4 | 0.135 | 0.015 | 0.24 | 0.18 | 0.03 | 0 | N/A |
| OsLOX4 | 0.41 | 0.13 | 0.02 | 0.22 | 0.17 | 0.05 | 0 | N/A |
| OsLOX5 | 0.39 | 0.14 | 0.02 | 0.26 | 0.16 | 0.03 | 0 | N/A |
| OsLOX6 | 0.31 | 0.133 | 0.006 | 0.21 | 0.29 | 0.05 | 1 | 664 to 673 |
| OsLOX7 | 0.39 | 0.14 | 0.02 | 0.23 | 0.19 | 0.03 | 0 | N/A |
| OsLOX8 | 0.39 | 0.13 | 0.02 | 0.2 | 0.22 | 0.04 | 0 | N/A |
| OsLOX9 | 0.39 | 0.113 | 0.017 | 0.21 | 0.24 | 0.03 | 0 | N/A |
| OsLOX10 | 0.38 | 0.113 | 0.016 | 0.23 | 0.22 | 0.04 | 0 | N/A |
| OsLOX11 | 0.4 | 0.11 | 0.01 | 0.21 | 0.24 | 0.03 | 0 | N/A |
| OsLOX12 | 0.3 | 0.13 | 0.03 | 0.24 | 0.25 | 0.05 | 0 | N/A |
