# Supplementary material for: Genome-Wide Identification and Expression Analysis of LOX Gene Family in Rice (Oryza sativa L.) Under Abiotic Stress Conditions
Source: Research Square preprint supplement (doi:10.21203/rs.3.rs-8728944/v1), 2026-02-24
Supplement: Supplementary file 8 [file 82e10d2df8806ec89d25693b.docx]

| Gene name | **PLAT/LH2 domain** | | **Lipoxygenase -iron-binding catalytic domain** | |
| --- | --- | --- | --- | --- |
| PROSITE profiles: PS50095  Pfam Accession: PF01477  SUPERFAMILY: SSF49723 | | PROSITE profiles: PS51393  Pfam Accession: PF00305  SUPERFAMILY: SSF48484 | |
| Start | End | Start | End |
| *OsLOX1* | 91 | 213 | 216 | 926 |
| *OsLOX2* | 90 | 218 | 221 | 918 |
| *OsLOX3* | 32 | 158 | 165 | 867 |
| *OsLOX4* | 38 | 165 | 168 | 877 |
| *OsLOX5* | 32 | 158 | 161 | 870 |
| *OsLOX6* | 68 | 204 | 207 | 643 |
| *OsLOX7* | 23 | 149 | 152 | 847 |
| *OsLOX8* | 88 | 218 | 225 | 924 |
| *OsLOX9* | 100 | 236 | 242 | 941 |
| *OsLOX10* | 32 | 150 | 154 | 868 |
| *OsLOX11* | 60 | 206 | 205 | 922 |
| *OsLOX12* | 3 | 100 | 102 | 358 |

**Table S2.** Characteristic conserved domains position of OsLOX proteins.
