# Supplementary material for: Genome-Wide Identification and Expression Analysis of LOX Gene Family in Rice (Oryza sativa L.) Under Abiotic Stress Conditions
Source: Research Square preprint supplement (doi:10.21203/rs.3.rs-8728944/v1), 2026-02-24
Supplement: Supplementary file 9 [file 87fb972c272ce217e7179656.xlsx]

## Sheet: Sheet1
Table S7. Details of the GO analysis of the predicted OsLOX genes.
ID	Classification	GO_Name	P-value	Adjusted P value
GO:0031408	Biological Process	oxylipin biosynthetic process	6.71e-07	6.17328
GO:0031407	Biological Process	oxylipin metabolic process	6.71e-07	6.17328
GO:0034440	Biological Process	lipid oxidation	2.34e-06	5.63078
GO:0030258	Biological Process	lipid modification	1.93e-05	4.71444
GO:0006633	Biological Process	fatty acid biosynthetic process	4.84e-05	4.31515
GO:0072330	Biological Process	monocarboxylic acid biosynthetic process	0.000103	3.98716
GO:0006631	Biological Process	fatty acid metabolic process	0.000209	3.67985
GO:0032787	Biological Process	monocarboxylic acid metabolic process	0.00116	2.93554
GO:0016053	Biological Process	organic acid biosynthetic process	0.00167	2.77728
GO:0046394	Biological Process	carboxylic acid biosynthetic process	0.00167	2.77728
GO:0008610	Biological Process	lipid biosynthetic process	0.00375	2.42597
GO:0044283	Biological Process	small molecule biosynthetic process	0.00403	2.39469
GO:0019752	Biological Process	carboxylic acid metabolic process	0.00963	2.01637
GO:0043436	Biological Process	oxoacid metabolic process	0.0102	1.9914
GO:0006082	Biological Process	organic acid metabolic process	0.0102	1.9914
GO:0006629	Biological Process	lipid metabolic process	0.0253	1.59688
GO:0016702	Molecular Function	oxidoreductase activity, acting on single donors with incorporation of molecular oxygen, incorporation of two atoms of oxygen	1.57e-05	4.8041
GO:0016701	Molecular Function	oxidoreductase activity, acting on single donors with incorporation of molecular oxygen	2.11e-05	4.67572
GO:0051213	Molecular Function	dioxygenase activity	0.000118	3.92812
GO:0009507	Cellular Component	chloroplast	0.00061	3.21467
GO:0009536	Cellular Component	plastid	0.00072	3.14267
GO:0005737	Cellular Component	cytoplasm	0.01128	1.94769

## Sheet: Sheet2
Table S7b. Details of the GO analysis of the predicted OsLOX genes
ID	Classification	P-value	Number of genes	Differential Genes	Expected Value
GO:0031408	Biological Process	6.71e-07	32	10	0.02
GO:0031407	Biological Process	6.71e-07	32	10	0.02
GO:0034440	Biological Process	2.34e-06	48	3	0.03
GO:0030258	Biological Process	1.93e-05	96	3	0.06
GO:0006633	Biological Process	4.84e-05	130	10	0.09
GO:0072330	Biological Process	0.000103	167	10	0.13
GO:0006631	Biological Process	0.000209	211	10	0.13
GO:0032787	Biological Process	0.00116	373	10	0.34
GO:0016053	Biological Process	0.00167	421	10	0.26
GO:0046394	Biological Process	0.00167	421	10	0.26
GO:0008610	Biological Process	0.00375	551	10	0.24
GO:0044283	Biological Process	0.00403	564	10	0.36
GO:0019752	Biological Process	0.00963	754	10	0.65
GO:0043436	Biological Process	0.0102	768	10	0.67
GO:0006082	Biological Process	0.0102	769	10	0.67
GO:0006629	Biological Process	0.0253	1040	10	0.46
GO:0016702	Molecular Function	1.57e-05	98	12	0.02
GO:0016701	Molecular Function	2.11e-05	108	12	0.03
GO:0051213	Molecular Function	0.000118	191	12	0.07
GO:0009507	Cellular Component	0.00061	1680	4	0.54
GO:0009536	Cellular Component	0.00072	1756	4	0.56
GO:0005737	Cellular Component	0.01128	6372	5	2.04
