# Supplementary material for: Genome-Wide Identification and Expression Analysis of LOX Gene Family in Rice (Oryza sativa L.) Under Abiotic Stress Conditions
Source: Research Square preprint supplement (doi:10.21203/rs.3.rs-8728944/v1), 2026-02-24
Supplement: Supplementary file 10 [file 9c41b2684d73560946919ceb.docx]

**Table S5.** List of all identified cis-regulatory elements discovered in the 5’ UTR region of *OsLOX*s along with their corresponding functions.

| **Responsive factors** | **CREs** | **Gene name and abundance** | **Function** |
| --- | --- | --- | --- |
| Abiotic challenge responsive | ARE | *OsLOX1*(1) *OsLOX2*(3) *OsLOX3*(2) *OsLOX4*(2) *OsLOX6*(3) *OsLOX8*(3) *OsLOX9*(5) *OsLOX11*(2) *OsLOX12*(3) | Element responsible for anaerobic induction |
| TC-rich repeats | *OsLOX1*(1) *OsLOX7*(1) *OsLOX11*(1) | Involved in defense & stress responsiveness |
| GC-motif | *OsLOX6*(2) *OsLOX9*(2) *OsLOX11*(1) | Enhancer-like element involved in anoxic specific inducibility |
| MBS | *OsLOX1*(1) *OsLOX2*(1) *OsLOX3*(1) *OsLOX5*(2) *OsLOX9*(1) *OsLOX10*(2) | MYB binding site involved in drought-inducibility |
| LTR | *OsLOX1*(1) *OsLOX2*(1) *OsLOX3*(1) *OsLOX4*(1) *OsLOX5*(2) *OsLOX8*(1) *OsLOX10*(1) *OsLOX11*(1) *OsLOX12*(1) | Involved in low-temperature responsiveness |
| Hormonal regulation responsive | ABRE | *OsLOX1*(7) *OsLOX2*(4) *OsLOX3*(3) *OsLOX4*(6) *OsLOX5*(10) *OsLOX6*(2) *OsLOX7*(1) *OsLOX8*(4) *OsLOX9*(6) *OsLOX10*(4) *OsLOX11*(6) *OsLOX12*(2) | Involved in the abscisic acid responsiveness |
| TGA-element | *OsLOX1*(2) *OsLOX3*(1) *OsLOX5*(1) *OsLOX6*(2) *OsLOX8*(3) *OsLOX9*(1) *OsLOX10*(1) *OsLOX11*(1) | Auxin-responsive element |
| AuxRR-core | *OsLOX10*(1) | Involved in auxin responsiveness |
| GARE-motif | *OsLOX10*(2) | Gibberellin-responsive element |
| P-box | *OsLOX2*(2) *OsLOX7*(1) | Gibberellin-responsive element |
| TATC-box | *OsLOX8*(1) | Involved in gibberellin-responsiveness |
| CGTCA-motif | *OsLOX2*(3) *OsLOX3*(2) *OsLOX4*(6) *OsLOX5*(2) *OsLOX6*(5) *OsLOX9*(2) | Involved in the MeJA-responsiveness |
| TGACG-motif | *OsLOX2*(3) *OsLOX3*(2) *OsLOX4*(6) *OsLOX5*(2) *OsLOX6*(7) | Involved in the MeJA-responsiveness |
| TCA-element | *OsLOX1*(1) *OsLOX3*(2) *OsLOX7*(2) *OsLOX9*(3) *OsLOX10*(1) *OsLOX11*(1) *OsLOX12*(1) | Involved in salicylic acid responsiveness |
| Biotic challenge responsive | W box | *OsLOX1*(1) *OsLOX3*(3) *OsLOX6*(1) *OsLOX7*(1) *OsLOX8*(2) *OsLOX10*(1) *OsLOX12*(1) | Fungal elicitor responsive mechanism |
| WUN-motif | *OsLOX1*(1) *OsLOX3*(1) | Wound responsive element |
| WRE3 | *OsLOX1*(1) *OsLOX2*(3) *OsLOX3*(2) *OsLOX4*(1) *OsLOX5*(1) *OsLOX6*(2) *OsLOX9*(1) *OsLOX11*(1) | Wound responsive element |
| Cellular development responsive | O2-site | *OsLOX1*(1) *OsLOX11*(1) *OsLOX12*(2) | Involved in zein metabolism regulation |
| RY-element | *OsLOX7*(1) *OsLOX8*(2) *OsLOX11*(1) *OsLOX12*(1) | Involved in seed-specific regulation |
| CAT-box | *OsLOX1*(1) *OsLOX2*(1) *OsLOX3*(2) *OsLOX5*(1) *OsLOX6*(3) *OsLOX7*(2) *OsLOX11*(1) | Cis-acting regulatory element related to meristem expression |
| GCN4_motif | *OsLOX7*(1) | Involved in endosperm expression |
| Circadian | *OsLOX6*(1) *OsLOX9*(1) | Involved in circadian control |
| Light responsive | G-box | *OsLOX1*(5) *OsLOX2*(5) *OsLOX3*(3) *OsLOX4*(3) *OsLOX5*(9) *OsLOX6*(8) *OsLOX7*(1) *OsLOX8*(5) *OsLOX9*(6) *OsLOX10*(4) *OsLOX11*(4) *OsLOX12*(3) | Involved in light responsiveness |
| Box 4 | *OsLOX1*(2) *OsLOX2*(1) *OsLOX3*(2) *OsLOX4*(3) *OsLOX5*(2) *OsLOX7*(3) *OsLOX8*(2) *OsLOX9*(3) *OsLOX10*(1) *OsLOX12*(1) | Part of a conserved DNA module involved in light responsiveness |
| GT1-motif | *OsLOX1*(1) *OsLOX4*(2) *OsLOX6*(2) *OsLOX8*(3) *OsLOX10*(1) | Light responsive element |
| TCCC-motif | *OsLOX1*(1) *OsLOX2*(1) *OsLOX6*(2) *OsLOX9*(1) *OsLOX11*(2) | Part of a light responsive element |
| AT1-motif | *OsLOX1*(1) | Part of a light responsive module |
| ATCT-motif | *OsLOX2*(1) *OsLOX3*(1) *OsLOX8*(1) *OsLOX10*(1) | Part of a conserved DNA module involved in light responsiveness |
| AE-box | *OsLOX6*(1) *OsLOX11*(1) | Part of a module for light response |
| Sp1 | *OsLOX2*(1) *OsLOX4*(3) *OsLOX5*(3) *OsLOX8*(1) *OsLOX9*(7) *OsLOX11*(5) *OsLOX12*(1) | Light responsive element |
| Gap-box | *OsLOX2*(1) *OsLOX7*(1) *OsLOX11*(1) | Part of a light responsive element |
| LS7 | *OsLOX11*(1) | Part of a light responsive element |
| GA-motif | *OsLOX2*(1) *OsLOX12*(1) | Part of a light responsive element |
| I-box | *OsLOX2*(1) *OsLOX3*(2) *OsLOX4*(1) | Part of a light responsive element |
| TCT-motif | *OsLOX4*(1) *OsLOX7*(2) *OsLOX9*(2) *OsLOX12*(1) | Part of a light responsive element |
| GATA-motif | *OsLOX2*(1) *OsLOX3*(1) *OsLOX4*(2) *OsLOX5*(1) *OsLOX6*(1) *OsLOX7*(1) *OsLOX9*(1) *OsLOX11*(1) | Part of a light responsive element |
| ACE | *OsLOX3*(1) *OsLOX8*(1) | Involved in light responsiveness |
| LAMP-element | *OsLOX4*(1) | Part of a light responsive element |
| GTGGC-motif | *OsLOX5*(1) | Light responsive element |
| MRE | *OsLOX7*(1) | MYB binding site involved in light responsiveness |
| Promoter-related elements | TATA-box | *OsLOX1*(58) *OsLOX2*(24), O*sLOX3*(16) *OsLOX4*(66) O*sLOX5*(31) *OsLOX6*(32) *OsLOX7*(27) *OsLOX8*(58) *OsLOX9*(34) *OsLOX10*(31) *OsLOX11*(23) *OsLOX12*(110) | Core promoter element around -30 of transcription start |
| CAAT-box | *OsLOX1*(18) *OsLOX2*(12) *OsLOX*(19) *OsLOX4*(9) *OsLOX5*(10) *OsLOX6*(17) *OsLOX7*(11) *OsLOX8*(13) *OsLOX9*(12) *OsLOX10*(15) *OsLOX11*(17) *OsLOX12*(11) | Common cis-acting element in promoter and enhancer regions |
| Miscellaneous functions | CCAAT-box | *OsLOX6*(1) *OsLOX8*(1) *OsLOX11*(1) | MYBHv1 binding site |
| A-box | *OsLOX2*(1) *OsLOX8*(1) *OsLOX9*(1) *OsLOX11*(1) | Cis-acting regulatory element |
| HD-Zip3 | *OsLOX8*(1) *OsLOX12*(1) | Protein binding site |
| AT-rich element | *OsLOX6*(1) | Binding site of AT-rich DNA binding protein (ATBP-1) |
