# Supplementary material for: Genome-Wide Identification and Expression Analysis of LOX Gene Family in Rice (Oryza sativa L.) Under Abiotic Stress Conditions
Source: Research Square preprint supplement (doi:10.21203/rs.3.rs-8728944/v1), 2026-02-24
Supplement: Supplementary file 11 [file b4c4ecdcd74908c2637795ab.docx]

**OsLOX1**

**
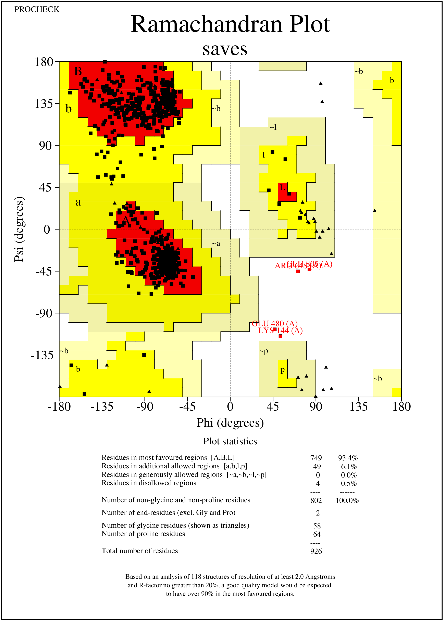
**

**OsLOX2**

**
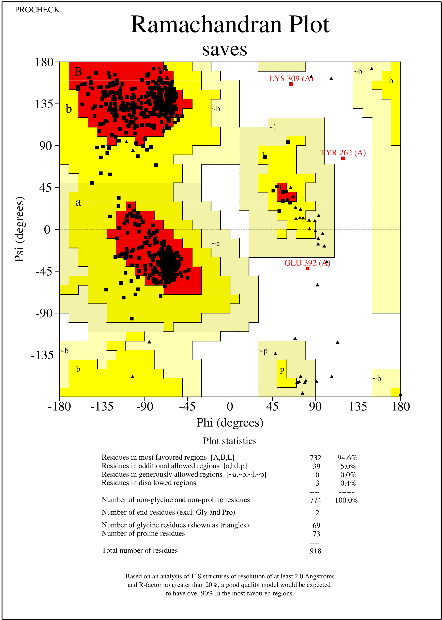
**

**OsLOX3**

**
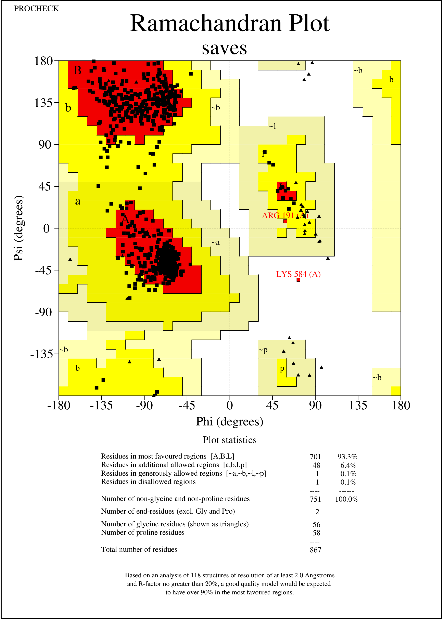
**

**OsLOX4**

**
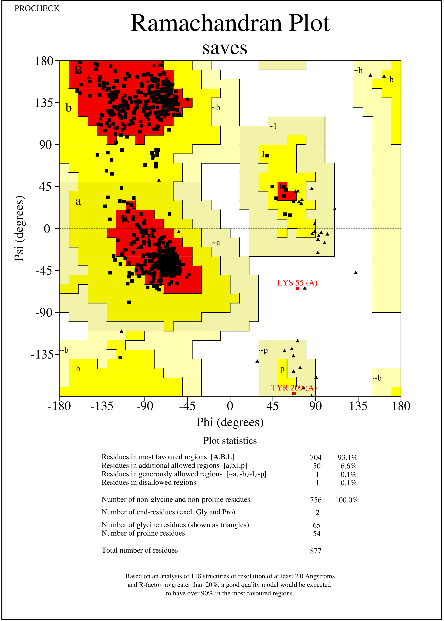
**

**OsLOX5**

**
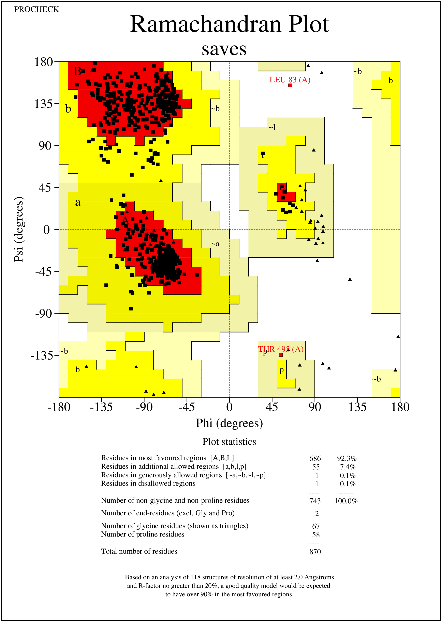
**

**OsLOX6**

**
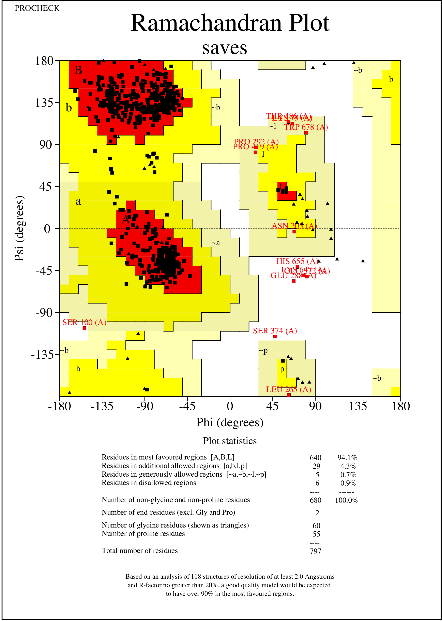
**

**OsLOX7**

**
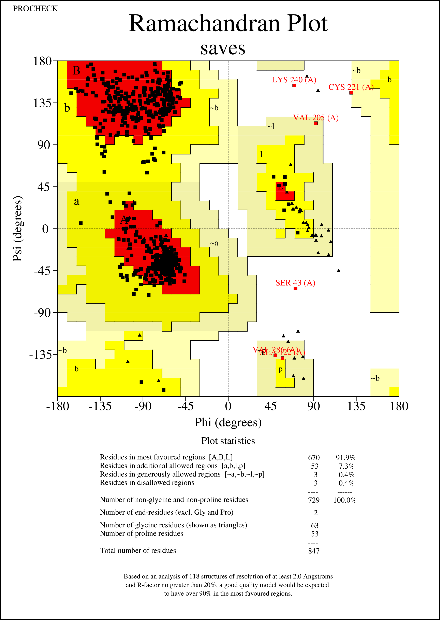
**

**OsLOX8**

**
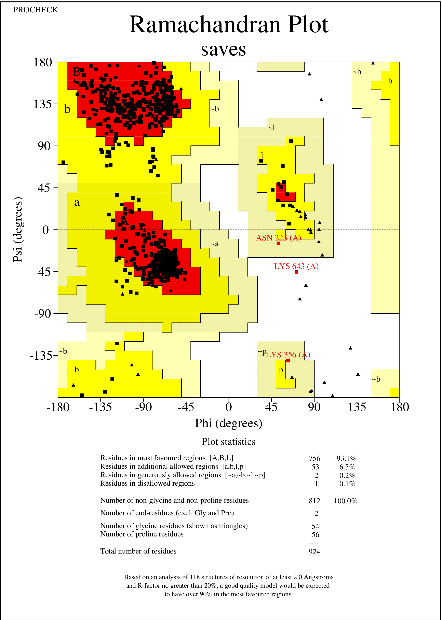
**

**OsLOX9**

**
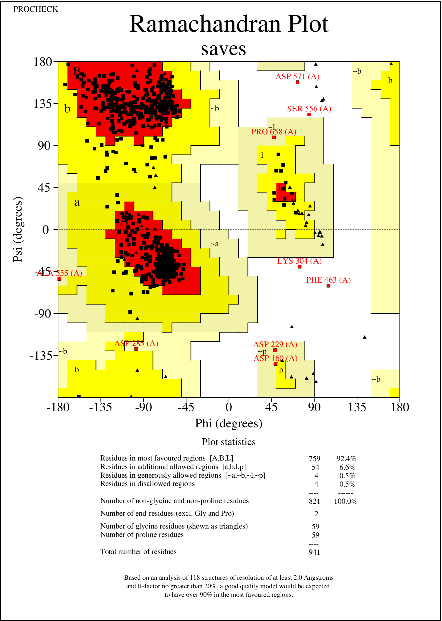
**

**OsLOX10**

**
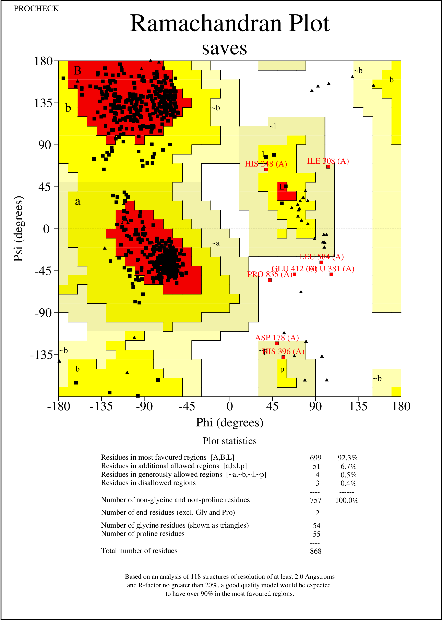
**

**OsLOX11**

**Figure S2.** Ramachandran plot of the 3D structures of OsLOXs. PROCHECK was utilized to create the Ramachandran plot. The hues red, yellow, light yellow, and white represent residues in the most favored, additional allowed, generously allowed, and disallowed regions respectively.

**
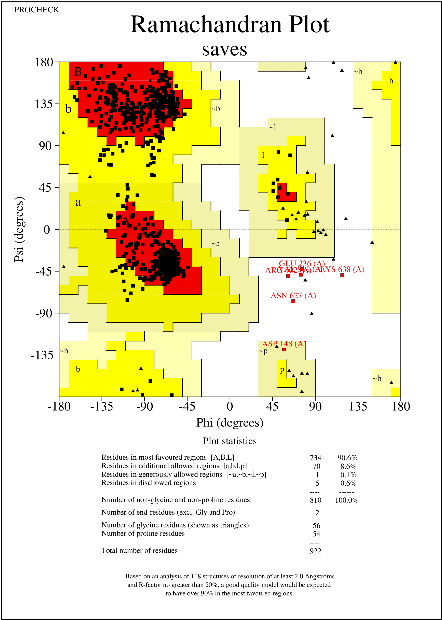
OsLOX12**

**
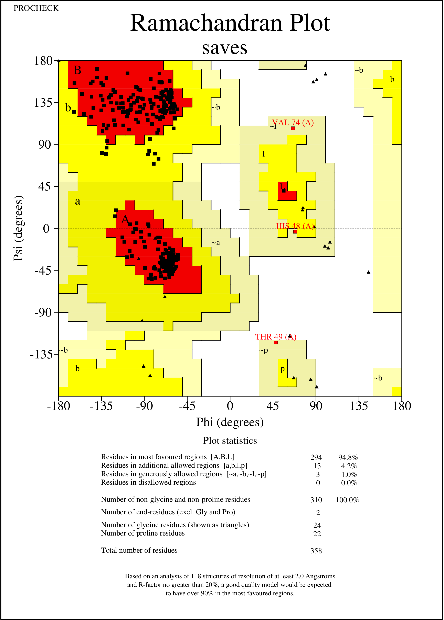
**
