# Supplementary material for: Genome-Wide Identification and Expression Analysis of LOX Gene Family in Rice (Oryza sativa L.) Under Abiotic Stress Conditions
Source: Research Square preprint supplement (doi:10.21203/rs.3.rs-8728944/v1), 2026-02-24
Supplement: Supplementary file 12 [file d299345370b75359027df389.docx]

**Table S10.** Tertiary structure validation score of OsLOX proteins via different tools.

| **Protein Name** | **PROCHECK** | | | | **ERRAT** | **Z-Score** |
| --- | --- | --- | --- | --- | --- | --- |
| **Residues in most favoured region** | **Residues in the additional allowed region** | **Residues in generously allowed region** | **Residues in disallowed region** |
| OsLOX1 | 93.4 | 6.1 | 0.0 | 0.5 | 95.6472 | -11.65 |
| OsLOX2 | 94.6 | 5.0 | 0.0 | 0.4 | 93.160 | -12.46 |
| OsLOX3 | 93.3 | 6.4 | 0.1 | 0.1 | 95.7746 | -13.01 |
| OsLOX4 | 93.1 | 6.6 | 0.1 | 0.1 | 92.6097 | -13.04 |
| OsLOX5 | 92.3 | 7.4 | 0.1 | 0.1 | 95.0237 | -12.76 |
| OsLOX6 | 94.1 | 4.3 | 0.7 | 0.9 | 92.4383 | -9.96 |
| OsLOX7 | 91.1 | 7.3 | 0.4 | 0.4 | 93.7576 | -13.49 |
| OsLOX8 | 93.1 | 6.5 | 0.2 | 0.1 | 94.104 | -11.72 |
| OsLOX9 | 92.4 | 6.6 | 0.5 | 0.5 | 94.5205 | -11.7 |
| OsLOX10 | 92.3 | 6.7 | 0.5 | 0.4 | 95.5368 | -13.34 |
| OsLOX11 | 90.6 | 8.6 | 0.1 | 0.6 | 93.6246 | -11.62 |
| OsLOX12 | 94.8 | 4.2 | 1.0 | 0.0 | 94.7692 | -7.65 |
