# Supplementary material for: Genome-Wide Identification and Expression Analysis of LOX Gene Family in Rice (Oryza sativa L.) Under Abiotic Stress Conditions
Source: Research Square preprint supplement (doi:10.21203/rs.3.rs-8728944/v1), 2026-02-24
Supplement: Supplementary file 13 [file d6ac549a1cc32780723757da.docx]

**Table S3.** Identified conserved motifs with their width, symbol and description

| **Motif** | **Sequence** | **Width** | **E-value** | **Description** |
| --- | --- | --- | --- | --- |
| 1 | 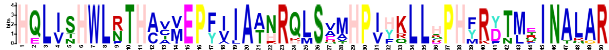 | 50 | 1.5e-341 | Lipoxygenase family |
| 2 | 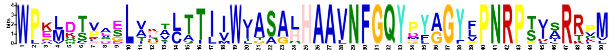 | 50 | 6.0e-236 | Lipoxygenase family |
| 3 | 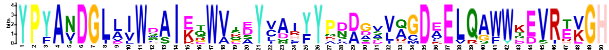 | 50 | 2.8e-232 | Lipoxygenase family |
| 4 | 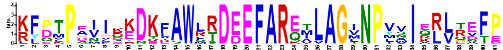 | 41 | 3.0e-204 | Lipoxygenase family |
| 5 | 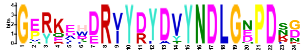 | 24 | 3.7e-141 | None predicted |
| 6 | 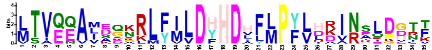 | 35 | 6.2e-133 | None predicted |
| 7 | 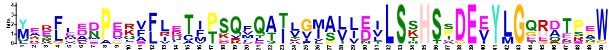 | 50 | 8.2e-137 | Lipoxygenase family |
| 8 | 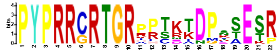 | 22 | 3.9e-108 | None predicted |
| 9 | 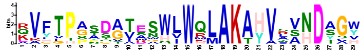 | 29 | 2.1e-104 | None predicted |
| 10 | 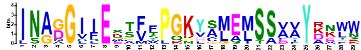 | 29 | 3.7e-104 | None predicted |
| 11 | 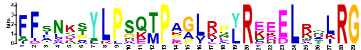 | 29 | 2.0e-103 | None predicted |
| 12 | 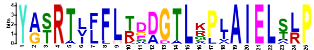 | 25 | 5.4e-113 | None predicted |
| 13 | 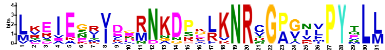 | 31 | 5.4e-082 | None predicted |
| 14 | 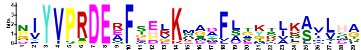 | 29 | 3.9e-075 | None predicted |
| 15 | 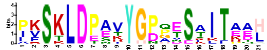 | 21 | 1.4e-060 | None predicted |
