# Supplementary material for: Genome-Wide Identification and Expression Analysis of LOX Gene Family in Rice (Oryza sativa L.) Under Abiotic Stress Conditions
Source: Research Square preprint supplement (doi:10.21203/rs.3.rs-8728944/v1), 2026-02-24
Supplement: Supplementary file 14 [file dec2cb4479ff38526f202cd1.docx]

**Table S8.** Predicted protein family’s interaction with *OsLOX* genes.

| **Protein Name** | **Protein Family & Putative Function** | **Interactive-Bit Score** |
| --- | --- | --- |
| SLM1 | Os02g0110200 protein; Cytochrome P450 family protein. | 0.95 |
| CYP74A3 | Allene oxide synthase 3; Involved in the biosynthesis of jasmonic acid, a growth regulator, signaling molecule in plant defense; Cytochrome P450 family protein. | 0.861 |
| CYP74A1 | Allene oxide synthase 1; Involved in the biosynthesis of jasmonic acid, a growth regulator, signaling molecules in plant defense. | 0.958 |
| CYP74A4 | Allene oxide synthase 4; Involved in the biosynthesis of jasmonic acid, a growth regulator, signaling molecule in plant defense; Cytochrome P450 family protein. | 0.872 |
| Q2RAM0_ORYSJ | Lipase family protein. | 0.88 |
| CYP74A2 | Allene oxide synthase 2; Involved in the biosynthesis of jasmonic acid, a growth regulator, signaling molecule in plant defense; Cytochrome P450 family protein. | 0.904 |
| PLA2-III | Phospholipase A2 homolog 3; Releases lysophospholipids (LPLs) and free fatty acids (FFAs) from membrane phospholipids in response to hormones and other external stimuli. | 0.888 |
| AOC | Allene oxide cyclase; Involved in production of 12-oxo-phytodienoic acid (OPDA)-JA precursor, auxin-mediated signaling pathway & implicated in NaCl stress response; Allene oxide cyclase family protein. | 0.63 |
| Q2R2W3_ORYSJ | Phospholipase A2, putative, expressed. | 0.852 |
| PLA2-II | Probable phospholipase A2 homolog 2; Releases lysophospholipids (LPLs) and free fatty acids (FFAs) from membrane phospholipids in response to hormones and other external stimuli. | 0.826 |
