# Supplementary material for: Genome-Wide Identification and Expression Analysis of LOX Gene Family in Rice (Oryza sativa L.) Under Abiotic Stress Conditions
Source: Research Square preprint supplement (doi:10.21203/rs.3.rs-8728944/v1), 2026-02-24
Supplement: Supplementary file 15 [file f82986ebe6756d6969810aab.docx]

**Table S4.** The chromosomal locations, positions, and orientations of all OsLOXs.

| **Gene Name** | **Chromosome Number** | **Chromosomal Location** | **Chromosomal Orientation** |
| --- | --- | --- | --- |
| *OsLOX1* | 2 | 5282626 - 5276620 | R |
| *OsLOX2* | 3 | 4187107 - 4193539 | F |
| *OsLOX3* | 3 | 28049441 -28053725 | F |
| *OsLOX4* | 3 | 28106903 - 28113300 | F |
| *OsLOX5* | 3 | 30315455 - 30318972 | F |
| *OsLOX6* | 4 | 22305064 - 22309320 | F |
| *OsLOX7* | 5 | 13734067 - 13740568 | F |
| *OsLOX8* | 8 | 25224080 - 25216363 | R |
| *OsLOX9* | 8 | 25240906 - 25250046 | F |
| *OsLOX10* | 11 | 21675027 - 21684774 | F |
| *OsLOX11* | 12 | 22860200 - 22854611 | R |
| *OsLOX12* | 12 | 22920107 - 22923778 | F |
